# Supplementary material for: The leukocyte telomere length, single nucleotide polymorphisms near TERC gene and risk of COPD
Source: PeerJ. 2021 Nov 11;9:e12190. doi: 10.7717/peerj.12190 (PMC8590800; doi:10.7717/peerj.12190)
Supplement: Supplemental Information 1 [file peerj-09-12190-s001.xls]

## Sheet: TERC-raw data
male	Age	Age_3groups	Age_2groups	Age_less12	Age_less60	Diseases_controls	Controls_smoking_COPD	COPD_Controls_smoking	PtsControls	Nationality	Height	Weight	Paketogodini	Smoking_3gr_new	Smoking_3groups	Smoking_2groups	Smokers_never_ex	Family	Diseasefromyears	Disease_less4median	Age_65years	PtsTherapy	Pts_therapy	Pridruzhavdisease	Naqalobolespridrt	Drugolechenie	Age_of_disease	Age_disease_60years	Age_of_dis_50	Age_of_dis_40	Age_diseases_35years	FEV1predicted	FEV1FVC.3	PEF.3	PEFlmin	COPD_stage	Stage_2vs3and4	Stage_2and3vs$	PtsTherapy.2	Diabet	Pridruzhavdisease.2	Pridruzhavdiseaseany	TEL_poly_sucdcessful_study	TERC_126_studied	TERC_126_geno	TERC_CCvsG	TERC_109_studied	TERC_109_geno	TERC_CCvsT
female	67	60-69	≥60		≥60	COPD	COPD	COPD current smokers	Patients	Bulgarian	1.55	53	41	current smokers	current smokers	ex/current sm	current smokers	no	6	≥4 median	≥65						47	<60	<50	≥40	>35	52	61.83			II	II	II/III	a-yes	no	YES	yes	studied	studied	CC	CC	studied	CC	CC
female	70	≥70	≥60		≥60	COPD	COPD	COPD ex-smokers	Patients	Bulgarian	1.68	48	15	ex-smokers	ex-smokers	ex/current sm	non/ex-smokers	no	2.5	< 4 median	≥65	a-yes	yes	AH, IBS	4	enalapril	67	≥60	≥50	≥40	>35	60	66.59			II	II	II/III	a-yes	no	YES	yes	studied	studied	CC	CC	studied	CC	CC
female	74	≥70	≥60		≥60	COPD	COPD	COPD ex-smokers	Patients	Bulgarian	1.75	74	23	ex-smokers	ex-smokers	ex/current sm	non/ex-smokers	no	2	< 4 median	≥65	a-yes	yes	AH,IBS	3	valtensin	72	≥60	≥50	≥40	>35	59	62.59			II	II	II/III	a-yes	no	YES	yes	studied	studied	CC	CC	studied	CC	CC
male	68	60-69	≥60		≥60	COPD	COPD	COPD nonsmokers	Patients	Bulgarian	1.68	85		non smokers	non smokers	non smokers	non/ex-smokers		4	≥4 median	≥65	a-yes	yes				64	≥60	≥50	≥40	>35	57	66.3	3.61	361	II	II	II/III	a-yes	no	NO	no	studied	studied	CC	CC	studied	CC	CC
female	64	60-69	≥60		≥60	COPD	COPD	COPD ex-smokers	Patients	Bulgarian	1.85	100	20	ex-smokers	ex-smokers	ex/current sm	non/ex-smokers		8	≥4 median	<65						56	<60	≥50	≥40	>35	40	66.4	1.47	147	III	III/IV	II/III	b-no	no	NO	no	studied	studied	CC	CC	studied	CC	CC
male	55	<60	<60		<60	COPD	COPD	COPD nonsmokers	Patients	Bulgarian	1.65	61		non smokers	non smokers	non smokers	non/ex-smokers	no	0.2	< 4 median	<65	a-yes	yes	HDihN/Plevralen izliv/HIBS/HSSN			54.8	<60	≥50	≥40	>35	29	56	1.57	157	IV	III/IV	IV	a-yes	no	YES	yes	studied	studied	CC	CC	studied	CC	CC
female	64	60-69	≥60		≥60	COPD	COPD	COPD current smokers	Patients	Bulgarian	1.72	103	50	current smokers	current smokers	ex/current sm	current smokers	no	0	< 4 median	<65						64	≥60	≥50	≥40	>35	72	70	2.79	279	II	II	II/III					studied	studied	CC	CC	studied	CC	CC
male	53	<60	<60		<60	controls			Controls	Bulgarian											<65							<60															studied	studied	CC	CC	studied	CC	CC
male	72	≥70	≥60		≥60	controls	controls non-smokers	controls non-smokers	Controls	Bulgarian	1.7	80		non smokers	non smokers	non smokers	non/ex-smokers	no			≥65			zdrav				≥60															studied	studied	CC	CC	studied	CC	CC
male	57	<60	<60		<60	COPD	COPD	COPD nonsmokers	Patients	Bulgarian	1.66	76		non smokers	non smokers	non smokers	non/ex-smokers	no	0.01	< 4 median	<65			Vibracionna bolest/HVenozna N			56.99	<60	≥50	≥40	>35	34.4	69	2.19	219	III	III/IV	II/III	b-no	no	NO	yes	studied	studied	GC	CG/GG	studied	CC	CC
male	52	<60	<60		<60	controls	controls non-smokers	controls non-smokers	Controls	Bulgarian	1.78	83		non smokers	non smokers	non smokers	non/ex-smokers	no			<65			zdrav				≥60															studied	studied	GC	CG/GG	studied	CC	CC
female	51	<60	<60		<60	COPD	COPD	COPD current smokers	Patients	Bulgarian	1.73	66	30	current smokers	current smokers	ex/current sm	current smokers	no	2.5	< 4 median	<65	a-yes	yes	AH,IBS	5	enalapril	48	<60	<50	≥40	>35	55	66.56			II	II	II/III	a-yes	no	YES	yes	studied	studied	GC	CG/GG	studied	CT	CT/TT
female	60	60-69	≥60		≥60	COPD	COPD	COPD ex-smokers	Patients	Bulgarian	1.76	65	41	ex-smokers	ex-smokers	ex/current sm	non/ex-smokers	no	1	< 4 median	<65						64	≥60	≥50	≥40	>35	53	57.3			II	II	II/III	a-yes	no	YES	yes	studied	studied	GC	CG/GG	studied	CT	CT/TT
female	68	60-69	≥60		≥60	COPD	COPD	COPD current smokers	Patients	Bulgarian	1.68	85	40	current smokers	current smokers	ex/current sm	current smokers	no	8	≥4 median	≥65						60	≥60	≥50	≥40	>35	51	66.3	3.61	361	II	II	II/III	b-no	no	NO	no	studied	studied	GC	CG/GG	studied	CT	CT/TT
female	54	<60	<60		<60	controls	controls currenmt smok	controls currenmt smok	Controls	Bulgarian	1.63	68	20	current smokers	current smokers	ex/current sm	current smokers	no			<65			zdrav				<60												no	NO	no	studied	studied	GC	CG/GG	studied	CT	CT/TT
male	38	<60	<60		<60	controls			Controls	Bulgarian											<65							<60															studied	studied	GC	CG/GG	studied	CT	CT/TT
male	68	60-69	≥60		≥60	controls	controls non-smokers	controls non-smokers	Controls	Bulgarian	1.65	82		non smokers	non smokers	non smokers	non/ex-smokers	no			≥65			zdrav				≥60				94	76.3										studied	studied	GG	CG/GG	studied	TT	CT/TT
female	77	≥70	≥60		≥60	COPD	COPD	COPD ex-smokers	Patients	Bulgarian	1.65	68	48	ex-smokers	ex-smokers	ex/current sm	non/ex-smokers	no	1	< 4 median	≥65	a-yes	yes	MSB, hiperton.b.,hemipareza,HIBS	4	kavinton	76	≥60	≥50	≥40	>35	45	67.02			II	II	II/III	a-yes	no	YES	yes	studied	non			studied	CC	CC
female	60	60-69	≥60		≥60	controls	controls currenmt smok	controls currenmt smok	Controls	Bulgarian	1.6	65	5	current smokers	current smokers	ex/current sm	current smokers	no			<65			zdrav				≥60															studied	non			studied	CT	CT/TT
female	69	60-69	≥60		≥60	controls	controls non-smokers	controls non-smokers	Controls	Bulgarian	1.65	82		non smokers	non smokers	non smokers	non/ex-smokers	no			≥65			zdrav				≥60				92	93	3.6	360								studied	studied			studied	TT	CT/TT
male	71	≥70	≥60		≥60	COPD	COPD	COPD nonsmokers	Patients	Bulgarian	1.65	67		non smokers	non smokers	non smokers	non/ex-smokers		2	< 4 median	≥65			HSSN			69	≥60	≥50	≥40	>35	56	62.3	2.17	217	II	II	II/III	b-no	no	NO	yes	studied	studied	CC	CC	studied	CC	CC
male	57	<60	<60		<60	COPD	COPD	COPD nonsmokers	Patients	Bulgarian	1.77	72		non smokers	non smokers	non smokers	non/ex-smokers	no	7.5	≥4 median	<65	a-yes	yes	HDihN/AH, HSSN			49.5	<60	<50	≥40	>35	32.3	59	2.2	220	III	III/IV	II/III	a-yes	no	NO	yes	studied	studied	CC	CC	studied	CC	CC
female	58	<60	<60		<60	COPD	COPD	COPD ex-smokers	Patients	Bulgarian	1.8	75	15	ex-smokers	ex-smokers	ex/current sm	non/ex-smokers	no	3	< 4 median	<65			AH			55	<60	≥50	≥40	>35	20	44.3	2.16	216	IV	III/IV	IV	b-no	no	NO	yes	studied	studied	CC	CC	studied	CC	CC
female	65	60-69	≥60		≥60	COPD	COPD	COPD ex-smokers	Patients	Bulgarian	1.75	83	50	ex-smokers	ex-smokers	ex/current sm	non/ex-smokers	no	0.2	< 4 median	≥65	a-yes	yes	AH/D			64.8	≥60	≥50	≥40	>35	58	69	3.76	376	II	II	II/III	a-yes	yes	YES	yes	studied	studied	CC	CC	studied	CC	CC
female	75	≥70	≥60		≥60	COPD	COPD	COPD ex-smokers	Patients	Bulgarian	1.8	93	34	ex-smokers	ex-smokers	ex/current sm	non/ex-smokers	no	2	< 4 median	≥65	a-yes	yes	AH, HSSN, hyperhol., IBS, D	6	zofen,zokor	73	≥60	≥50	≥40	>35	53	68.13			II	II	II/III	a-yes	yes	YES	yes	studied	studied	CC	CC	studied	CC	CC
female	68	60-69	≥60		≥60	COPD	COPD	COPD nonsmokers	Patients	Bulgarian	1.55	80		non smokers	non smokers	non smokers	non/ex-smokers	no	20	≥4 median	≥65	a-yes	yes	AH/D/Liver Steatoza			48	<60	<50	≥40	>35	49.4	70	2.3	230	III	III/IV	II/III	a-yes	yes	YES	yes	studied	studied	CC	CC	studied	CC	CC
female	47	<60	<60		<60	controls	controls non-smokers	controls non-smokers	Controls	Bulgarian	1.68	74		non smokers	non smokers	non smokers	non/ex-smokers				<65			D	10	insulin		<60												yes	YES	yes	studied	studied	CC	CC	studied	CC	CC
female	68	60-69	≥60		≥60	controls	controls non-smokers	controls non-smokers	Controls	Bulgarian	1.7	76		non smokers	non smokers	non smokers	non/ex-smokers				≥65			D				≥60												yes	YES	yes	studied	studied	CC	CC	studied	CC	CC
male	59	<60	<60		<60	COPD	COPD	COPD nonsmokers	Patients	Bulgarian	1.7	105		non smokers	non smokers	non smokers	non/ex-smokers	no	17	≥4 median	<65						42	<60	<50	≥40	>35	74	66	3.47	347	II	II	II/III					studied	studied	CC	CC	studied	CC	CC
female	64	60-69	≥60		≥60	COPD	COPD	COPD ex-smokers	Patients	Bulgarian	1.86	102	18	ex-smokers	ex-smokers	ex/current sm	non/ex-smokers	no	10	≥4 median	<65						54	<60	≥50	≥40	>35	54	55.1	6.02	602	II	II	II/III	b-no		NO	no	studied	studied	CC	CC	studied	CC	CC
female	65	60-69	≥60		≥60	COPD	COPD	COPD nonsmokers	Patients	Bulgarian	1.4	73		non smokers	non smokers	non smokers	non/ex-smokers	no	1	< 4 median	≥65						64	≥60	≥50	≥40	>35	79	70	2.59	259	II	II	II/III					studied	studied	CC	CC	studied	CC	CC
female	74	≥70	≥60		≥60	COPD	COPD	COPD ex-smokers	Patients	Bulgarian	1.55	58	10	ex-smokers	ex-smokers	ex/current sm	non/ex-smokers	no	3	< 4 median	≥65						71	≥60	≥50	≥40	>35	52	62	2.26	226	II	II	II/III					studied	studied	CC	CC	studied	CC	CC
female	56	<60	<60		<60	COPD	COPD	COPD current smokers	Patients	Bulgarian	1.5	75	20	current smokers	current smokers	ex/current sm	current smokers	no	5	≥4 median	<65						51	<60	≥50	≥40	>35	42	46.4	1.87	187	III	III/IV	II/III					studied	studied	CC	CC	studied	CC	CC
female	74	≥70	≥60		≥60	COPD	COPD	COPD ex-smokers	Patients	Bulgarian	1.64	75	30	ex-smokers	ex-smokers	ex/current sm	non/ex-smokers	no	1	< 4 median	≥65						73	≥60	≥50	≥40	>35	40	66	1.25	125	III	III/IV	II/III					studied	studied	CC	CC	studied	CC	CC
female	75	≥70	≥60		≥60	COPD	COPD	COPD ex-smokers	Patients	Bulgarian	1.64	70	30	ex-smokers	ex-smokers	ex/current sm	non/ex-smokers	no	7	≥4 median	≥65						68	≥60	≥50	≥40	>35	27	60	1.72	172	IV	III/IV	IV					studied	studied	CC	CC	studied	CC	CC
female	47	<60	<60		<60	controls	controls ex-smokers	controls ex-smokers	Controls	Bulgarian	1.7	95	11	ex-smokers	ex-smokers	ex/current sm	non/ex-smokers				<65			vibracionna bolest, AH				<60															studied	studied	CC	CC	studied	CC	CC
female	54	<60	<60		<60	controls	controls currenmt smok	controls currenmt smok	Controls	Bulgarian	1.6	68	5	current smokers	current smokers	ex/current sm	current smokers	no			<65			zdrav				<60															studied	studied	CC	CC	studied	CC	CC
female	45	<60	<60		<60	controls	controls currenmt smok	controls currenmt smok	Controls	Bulgarian	1.55	106	20	current smokers	current smokers	ex/current sm	current smokers				<65			zdrav				<60															studied	studied	CC	CC	studied	CC	CC
male	29	<60	<60		<60	controls			Controls	Bulgarian											<65							<60															studied	studied	CC	CC	studied	CC	CC
male	68	60-69	≥60		≥60	controls	controls non-smokers	controls non-smokers	Controls	Bulgarian	1.7	95		non smokers	non smokers	non smokers	non/ex-smokers	no			≥65			zdrav				≥60															studied	studied	CC	CC	studied	CC	CC
male	69	60-69	≥60		≥60	controls	controls non-smokers	controls non-smokers	Controls	Bulgarian	1.74	107		non smokers	non smokers	non smokers	non/ex-smokers				≥65			myzhdene/tirotoksikoza	2	tyroxin		≥60														yes	studied	studied	CC	CC	studied	CC	CC
female	50	<60	<60		<60	controls	controls currenmt smok	controls currenmt smok	Controls	Bulgarian	1.75	86	20	current smokers	current smokers	ex/current sm	current smokers	no			<65			zdrav				<60												no	NO	no	studied	studied	GC	CG/GG	studied	CC	CC
female	80	≥70	≥60		≥60	COPD	COPD	COPD nonsmokers	Patients	Bulgarian	1.45	73		non smokers	non smokers	non smokers	non/ex-smokers	no	13	≥4 median	≥65						67	≥60	≥50	≥40	>35	73	70	1.33	133	II	II	II/III					studied	studied	GC	CG/GG	studied	CC	CC
male	50	<60	<60		<60	controls	controls non-smokers	controls non-smokers	Controls	Bulgarian	1.75	80		non smokers	non smokers	non smokers	non/ex-smokers				<65			pneumonia				<60														yes	studied	studied	GG	CG/GG	studied	CC	CC
female	55	<60	<60		<60	controls	controls non-smokers	controls non-smokers	Controls	Bulgarian	1.63	82		non smokers	non smokers	non smokers	non/ex-smokers				<65			D	3			<60												yes	YES	yes	studied	studied	CC	CC	studied	CT	CT/TT
female	76	≥70	≥60		≥60	COPD	COPD	COPD nonsmokers	Patients	Bulgarian	1.6	55		non smokers	non smokers	non smokers	non/ex-smokers	no	0.5	< 4 median	≥65	a-yes	yes	AH/HSSN/OSTEOPOROSA			75.5	≥60	≥50	≥40	>35	51	65.2	1.83	183	II	II	II/III	a-yes	no	NO	yes	studied	studied	GC	CG/GG	studied	CT	CT/TT
female	54	<60	<60		<60	COPD	COPD	COPD current smokers	Patients	Bulgarian	1.58	80	20	current smokers	current smokers	ex/current sm	current smokers		5	≥4 median	<65	a-yes	yes	AH			49	<60	<50	≥40	>35	40	49	2.53	253	III	III/IV	II/III	a-yes	no	NO	yes	studied	studied	GC	CG/GG	studied	CT	CT/TT
male	55	<60	<60		<60	COPD	COPD	COPD nonsmokers	Patients	Bulgarian	1.65	82		non smokers	non smokers	non smokers	non/ex-smokers	no	9	≥4 median	<65	a-yes	yes	D/HB/HIBS, MI			46	<60	<50	≥40	>35	56.6	61.3	3.15	315	II	II	II/III	a-yes	yes	YES	yes	studied	studied	GC	CG/GG	studied	CT	CT/TT
male	52	<60	<60		<60	controls	controls non-smokers	controls non-smokers	Controls	Bulgarian	1.8	85		non smokers	non smokers	non smokers	non/ex-smokers	no			<65			zdrav				<60															studied	studied	GC	CG/GG	studied	CT	CT/TT
female	56	<60	<60		<60	controls	controls non-smokers	controls non-smokers	Controls	Bulgarian	1.6	62		non smokers	non smokers	non smokers	non/ex-smokers				<65			pneumonia				<60														yes	studied	studied	GC	CG/GG	studied	CT	CT/TT
male	62	60-69	≥60		≥60	COPD	COPD	COPD nonsmokers	Patients	Bulgarian	1.76	78		non smokers	non smokers	non smokers	non/ex-smokers	no	1	< 4 median	<65						61	≥60	≥50	≥40	>35	73	65.3	3.04	304	II	II	II/III					studied	studied	GG	CG/GG	studied	CT	CT/TT
male	61	60-69	≥60		≥60	controls	controls non-smokers	controls non-smokers	Controls	Bulgarian	1.62	86		non smokers	non smokers	non smokers	non/ex-smokers	no			<65			AH, HIBS, NAP, NDBB				≥60															studied	studied	GG	CG/GG	studied	CT	CT/TT
female	70	≥70	≥60		≥60	COPD	COPD	COPD nonsmokers	Patients	Bulgarian	1.48	57		non smokers	non smokers	non smokers	non/ex-smokers	no	0.2	< 4 median	≥65	a-yes	yes	AH/tireodektomija			69.8	≥60	≥50	≥40	>35	47	63.5	1.66	166	III	III/IV	II/III	a-yes	no	NO	yes	studied	studied	GG	CG/GG	studied	TT	CT/TT
female	80	≥70	≥60		≥60	COPD	COPD	COPD nonsmokers	Patients	Bulgarian	1.52	64		non smokers	non smokers	non smokers	non/ex-smokers	no	2.6	< 4 median	≥65	a-yes	yes	HDihN/HSSN/Lung diseases			77.4	≥60	≥50	≥40	>35	48.4	69	0.94	94	III	III/IV	II/III	a-yes	no	NO	yes	studied	studied	CC	CC	studied	CC	CC
female	82	≥70	≥60		≥60	COPD	COPD	COPD ex-smokers	Patients	Bulgarian	1.8	62	30	ex-smokers	ex-smokers	ex/current sm	non/ex-smokers	no	15	≥4 median	≥65	a-yes	yes				67	≥60	≥50	≥40	>35	34	44	1.88	188	III	III/IV	II/III	a-yes	no	NO	no	studied	studied	CC	CC	studied	CC	CC
female	52	<60	<60		<60	COPD	COPD	COPD ex-smokers	Patients	Bulgarian	1.8	120	5	ex-smokers	ex-smokers	ex/current sm	non/ex-smokers		10	≥4 median	<65			AH			42	<60	<50	≥40	>35	27	41.2	2.29	229	IV	III/IV	IV	b-no	no	NO	yes	studied	studied	CC	CC	studied	CC	CC
female	63	60-69	≥60		≥60	controls	controls currenmt smok	controls currenmt smok	Controls	Bulgarian	1.6	56	30	current smokers	current smokers	ex/current sm	current smokers	no			<65																			no		no	studied	studied	CC	CC	studied	CC	CC
female	57	<60	<60		<60	controls	controls non-smokers	controls non-smokers	Controls	Bulgarian	1.62	72		non smokers	non smokers	non smokers	non/ex-smokers				<65			D	9	insulin		<60												yes	YES	yes	studied	studied	CC	CC	studied	CC	CC
female	73	≥70	≥60		≥60	COPD	COPD	COPD ex-smokers	Patients	Bulgarian			60	ex-smokers	ex-smokers	ex/current sm	non/ex-smokers		0	< 4 median	≥65						73	≥60	≥50	≥40		40	70	2.9	290	III	III/IV	II/III					studied	studied	CC	CC	studied	CC	CC
male	76	≥70	≥60		≥60	controls			Controls	Bulgarian											≥65							<60															studied	studied	CC	CC	studied	CC	CC
male	79	≥70	≥60		≥60	controls			Controls	Bulgarian											≥65							≥60															studied	studied	CC	CC	studied	CC	CC
female	74	≥70	≥60		≥60	COPD	COPD	COPD nonsmokers	Patients	Bulgarian	1.6	70		non smokers	non smokers	non smokers	non/ex-smokers	no	4.5	≥4 median	≥65	a-yes	yes				69.5	≥60	≥50	≥40	>35	68	61.5	4.05	405	II	II	II/III	a-yes	no	NO	no	studied	studied	GC	CG/GG	studied	CC	CC
female	39	<60	<60		<60	controls	controls currenmt smok	controls currenmt smok	Controls	Bulgarian	1.67	59	12	current smokers	current smokers	ex/current sm	current smokers				<65			zdrav				<60												no	NO	no	studied	studied	GC	CG/GG	studied	CC	CC
female	79	≥70	≥60		≥60	COPD	COPD	COPD ex-smokers	Patients	Bulgarian	1.6	56	12	ex-smokers	ex-smokers	ex/current sm	non/ex-smokers	no	1.5	< 4 median	≥65	a-yes	yes	AH, HIBS, hiperholesterolemia	2	valtensin	77	≥60	≥50	≥40	>35	63	61.66			II	II	II/III	a-yes	no	YES	yes	studied	studied	GC	CG/GG	studied	CT	CT/TT
female	57	<60	<60		<60	controls	controls currenmt smok	controls currenmt smok	Controls	Bulgarian	1.57	58	5	current smokers	current smokers	ex/current sm	current smokers	no			<65			zdrav				<60															studied	studied	GC	CG/GG	studied	CT	CT/TT
male	76	≥70	≥60		≥60	controls	controls non-smokers	controls non-smokers	Controls	Bulgarian	1.8	98		non smokers	non smokers	non smokers	non/ex-smokers	no			≥65			zdrav				≥60															studied	studied	GC	CG/GG	studied	CT	CT/TT
female	55	<60	<60		<60	COPD	COPD	COPD current smokers	Patients	Bulgarian	1.72	80	30	current smokers	current smokers	ex/current sm	current smokers	no	1.1	< 4 median	<65			DBB/AH			53.9	<60	≥50	≥40	>35	76	69	2.65	265	II	II	II/III					studied	studied	GG	CG/GG	studied	TT	CT/TT
female	58	<60	<60		<60	COPD	COPD	COPD current smokers	Patients	Bulgarian	1.57	98	32	current smokers	current smokers	ex/current sm	current smokers		4	≥4 median	<65			AH			54	<60	≥50	≥40	>35	49	67.6	2.88	288	III	III/IV	II/III	b-no	no	NO	yes	studied	studied	CC	CC	studied	CC	CC
female	46	<60	<60		<60	controls	controls currenmt smok	controls currenmt smok	Controls	Bulgarian	1.9	105	60	current smokers	current smokers	ex/current sm	current smokers	yes			<65			iazva_na_stomaha																no		yes	studied	studied	CC	CC	studied	CC	CC
male	67	60-69	≥60		≥60	controls	controls non-smokers	controls non-smokers	Controls	Bulgarian	1.7	82		non smokers	non smokers	non smokers	non/ex-smokers				≥65			D	19	insulin		≥60												yes	YES	yes	studied	studied	CC	CC	studied	CC	CC
male	67	60-69	≥60		≥60	controls	controls non-smokers	controls non-smokers	Controls	Bulgarian	1.7	71		non smokers	non smokers	non smokers	non/ex-smokers				≥65			D	8	insulin		≥60												yes	YES	yes	studied	studied	CC	CC	studied	CC	CC
female	70	≥70	≥60		≥60	controls	controls non-smokers	controls non-smokers	Controls	Bulgarian	1.68	79		non smokers	non smokers	non smokers	non/ex-smokers				≥65			D	8	insulin		≥60												yes	YES	yes	studied	studied	CC	CC	studied	CC	CC
male	52	<60	<60		<60	COPD	COPD	COPD nonsmokers	Patients	Bulgarian	1.82	90		non smokers	non smokers	non smokers	non/ex-smokers	no	0.5	< 4 median	<65						51.5	<60	≥50	≥40	>35	74	69	3.86	386	II	II	II/III					studied	studied	CC	CC	studied	CC	CC
male	70	≥70	≥60		≥60	COPD			Patients	Bulgarian											≥65							≥60			>35	55	59.33			II	II	II/III					studied	studied	CC	CC	studied	CC	CC
female	50	<60	<60		<60	COPD	COPD	COPD current smokers	Patients	Bulgarian	1.74	78	30	current smokers	current smokers	ex/current sm	current smokers	no	0	< 4 median	<65						50	<60	<50	≥40	>35	47	66	2.13	213	III	III/IV	II/III					studied	studied	CC	CC	studied	CC	CC
female	72	≥70	≥60		≥60	COPD	COPD	COPD ex-smokers	Patients	Bulgarian	1.68	71	40	ex-smokers	ex-smokers	ex/current sm	non/ex-smokers	yes	5	≥4 median	≥65						67	≥60	≥50	≥40	>35	42	68	2.13	213	III	III/IV	II/III					studied	studied	CC	CC	studied	CC	CC
male	57	<60	<60		<60	controls			Controls	Bulgarian											<65							<60															studied	studied	CC	CC	studied	CC	CC
male	74	≥70	≥60		≥60	controls	controls non-smokers	controls non-smokers	Controls	Bulgarian	1.7	82		non smokers	non smokers	non smokers	non/ex-smokers	no			≥65			zdrav				≥60				113	76.6										studied	studied	CC	CC	studied	CC	CC
male	68	60-69	≥60		≥60	controls	controls non-smokers	controls non-smokers	Controls	Bulgarian	1.72	65		non smokers	non smokers	non smokers	non/ex-smokers				≥65			D	8	insulin		≥60												yes	YES	yes	studied	studied	GC	CG/GG	studied	CC	CC
female	59	<60	<60		<60	COPD	COPD	COPD ex-smokers	Patients	Bulgarian	1.62	94	22	ex-smokers	ex-smokers	ex/current sm	non/ex-smokers		12	≥4 median	<65						47	<60	<50	≥40	>35	38	58.4	2.8	280	III	III/IV	II/III	b-no	no	NO	no	studied	studied	GC	CG/GG	studied	CT	CT/TT
male	70	≥70	≥60		≥60	COPD	COPD	COPD nonsmokers	Patients	Bulgarian	1.66	69		non smokers	non smokers	non smokers	non/ex-smokers		4	≥4 median	≥65	a-yes	yes	??			66	≥60	≥50	≥40	>35	46	57.8	2	200	III	III/IV	II/III	a-yes	no	NO	yes	studied	studied	GC	CG/GG	studied	CT	CT/TT
female	72	≥70	≥60		≥60	controls	controls non-smokers	controls non-smokers	Controls	Bulgarian	1.6	85		non smokers	non smokers	non smokers	non/ex-smokers				≥65			D				≥60												yes	YES	yes	studied	studied	GC	CG/GG	studied	CT	CT/TT
female	61	60-69	≥60		≥60	controls	controls ex-smokers	controls ex-smokers	Controls	Bulgarian	1.7	85	10	ex-smokers	ex-smokers	ex/current sm	non/ex-smokers				<65			pnevmonija, AH, podagra				≥60															studied	studied	GC	CG/GG	studied	CT	CT/TT
female	67	60-69	≥60		≥60	controls	controls ex-smokers	controls ex-smokers	Controls	Bulgarian	1.72	80	20	ex-smokers	ex-smokers	ex/current sm	non/ex-smokers				≥65			AH				≥60															studied	studied	GC	CG/GG	studied	CT	CT/TT
male	67	60-69	≥60		≥60	COPD			Patients	Bulgarian											≥65							≥60								III	III/IV	II/III	b-no	no	NO		studied	studied	CC	CC	studied	CC	CC
female	64	60-69	≥60		≥60	COPD	COPD	COPD ex-smokers	Patients	Bulgarian			36	ex-smokers	ex-smokers	ex/current sm	non/ex-smokers		9	≥4 median	<65						55	<60	≥50	≥40		38.4	54.6	2.13	213	III	III/IV	II/III					studied	studied	CC	CC	studied	CC	CC
male	54	<60	<60		<60	COPD	COPD	COPD nonsmokers	Patients	Bulgarian	1.8	125		non smokers	non smokers	non smokers	non/ex-smokers	no	7	≥4 median	<65						47	<60	<50	≥40	>35	27.7	43.7	2.25	225	IV	III/IV	IV					studied	studied	CC	CC	studied	CC	CC
female	75	≥70	≥60		≥60	COPD	COPD	COPD current smokers	Patients	Bulgarian	1.65	73	50	current smokers	current smokers	ex/current sm	current smokers	no	11	≥4 median	≥65	a-yes	yes	AH			64	≥60	≥50	≥40	>35	56	66.3	1.29	129	II	II	II/III	a-yes	no	NO	yes	studied	studied	GC	CG/GG	studied	CT	CT/TT
male	67	60-69	≥60		≥60	COPD	COPD	COPD nonsmokers	Patients	Bulgarian	1.72	65		non smokers	non smokers	non smokers	non/ex-smokers	no	1	< 4 median	≥65						66	≥60	≥50	≥40	>35	61	61.5	2.33	233	II	II	II/III					studied	studied	GC	CG/GG	studied	CT	CT/TT
male	59	<60	<60		<60	controls			Controls	Bulgarian											<65			zdrav				<60															studied	studied	CC	CC	studied	CC	CC
male	79	≥70	≥60		≥60	COPD	COPD	COPD nonsmokers	Patients	Bulgarian	1.65	100		non smokers	non smokers	non smokers	non/ex-smokers	no	5	≥4 median	≥65						74	≥60	≥50	≥40	>35	53	66	1.44	144	II	II	II/III	b-no	no	YES	yes	studied	studied	CC	CC	studied	CC	CC
female	58	<60	<60		<60	COPD	COPD	COPD ex-smokers	Patients	Bulgarian	1.64	96	20	ex-smokers	ex-smokers	ex/current sm	non/ex-smokers	no	7	≥4 median	<65	a-yes	yes	D		amaril	51	<60	≥50	≥40	>35	51	63.6	3.41	341	II	II	II/III	a-yes	yes	YES	yes	studied	studied	CC	CC	studied	CC	CC
female	71	≥70	≥60		≥60	controls	controls non-smokers	controls non-smokers	Controls	Bulgarian	1.58	60		non smokers	non smokers	non smokers	non/ex-smokers				≥65			D/SDS				≥60												yes	YES	yes	studied	studied	CC	CC	studied	CC	CC
female	49	<60	<60		<60	controls	controls non-smokers	controls non-smokers	Controls	other (Turkish)	1.62	60		non smokers	non smokers	non smokers	non/ex-smokers				<65			struma	0.17			<60														yes	studied	studied	CC	CC	studied	CT	CT/TT
female	69	60-69	≥60		≥60	COPD	COPD	COPD ex-smokers	Patients	Bulgarian	1.75	75	30	ex-smokers	ex-smokers	ex/current sm	non/ex-smokers	no	2	< 4 median	≥65	a-yes	yes	D2, AH	2	enapr,siofor	67	≥60	≥50	≥40	>35	46	64.9			II	II	II/III	a-yes	yes	YES	yes	studied	studied	GC	CG/GG	studied	CT	CT/TT
male	60	60-69	≥60		≥60	controls	controls non-smokers	controls non-smokers	Controls	Bulgarian	1.73	80		non smokers	non smokers	non smokers	non/ex-smokers	no			<65			zdrav				≥60				82	76.4										studied	studied	GC	CG/GG	studied	CT	CT/TT
female	54	<60	<60		<60	controls	controls currenmt smok	controls currenmt smok	Controls	Bulgarian	1.8	82	15	current smokers	current smokers	ex/current sm	current smokers	yes			<65			hiperton/iazva																no		yes	studied	studied	GG	CG/GG	studied	TT	CT/TT
female	65	60-69	≥60		≥60	COPD	COPD	COPD ex-smokers	Patients	Bulgarian	1.68	58	30	ex-smokers	ex-smokers	ex/current sm	non/ex-smokers	no	2	< 4 median	≥65	a-yes	yes	Tahikardiya			63	≥60	≥50	≥40	>35	55	58.3	4.63	463	II	II	II/III	a-yes	no	NO	yes	studied	studied	CC	CC	studied	CC	CC
female	58	<60	<60		<60	COPD	COPD	COPD ex-smokers	Patients	Bulgarian			15	ex-smokers	ex-smokers	ex/current sm	non/ex-smokers				<65							<60								II	II	II/III		no	NO		studied	studied	CC	CC	studied	CC	CC
female	56	<60	<60		<60	COPD	COPD	COPD current smokers	Patients	Bulgarian	1.75	72	30	current smokers	current smokers	ex/current sm	current smokers	no	0.1	< 4 median	<65			HDihN/Fibrom larings			55.9	<60	≥50	≥40	>35	32.4	63	1.76	176	III	III/IV	II/III	b-no	no	NO	yes	studied	studied	CC	CC	studied	CC	CC
female	42	<60	<60		<60	controls	controls non-smokers	controls non-smokers	Controls	Bulgarian	1.68	56		non smokers	non smokers	non smokers	non/ex-smokers				<65			zdrav				<60												no	NO	no	studied	studied	CC	CC	studied	CC	CC
female	35	<60	<60		<60	controls	controls ex-smokers	controls ex-smokers	Controls	Bulgarian	1.6	82	10	ex-smokers	ex-smokers	ex/current sm	non/ex-smokers				<65			Autoimmune tyreoiditis	0.17	L-thyroxin		<60												no	YES	yes	studied	studied	CC	CC	studied	CC	CC
female	52	<60	<60		<60	controls	controls ex-smokers	controls ex-smokers	Controls	Bulgarian	1.62	60	20	ex-smokers	ex-smokers	ex/current sm	non/ex-smokers				<65				3			<60												no	NO	no	studied	studied	CC	CC	studied	CC	CC
female	53	<60	<60		<60	controls	controls non-smokers	controls non-smokers	Controls	Bulgarian	1.62	75		non smokers	non smokers	non smokers	non/ex-smokers				<65			D/AH	8	amaryl		≥60												yes	YES	yes	studied	studied	CC	CC	studied	CC	CC
female	73	≥70	≥60		≥60	controls	controls non-smokers	controls non-smokers	Controls	Bulgarian	1.58	60		non smokers	non smokers	non smokers	non/ex-smokers				≥65			AH/D	15	insulin		≥60												yes	YES	yes	studied	studied	CC	CC	studied	CC	CC
female	67	60-69	≥60		≥60	controls	controls currenmt smok	controls currenmt smok	Controls	Bulgarian	1.8	79	50	current smokers	current smokers	ex/current sm	current smokers				≥65			D	10	insulin		≥60												yes	YES	yes	studied	studied	CC	CC	studied	CC	CC
female	69	60-69	≥60		≥60	COPD	COPD	COPD ex-smokers	Patients	Bulgarian	1.7	82	30	ex-smokers	ex-smokers	ex/current sm	non/ex-smokers	no	2	< 4 median	≥65	a-yes	yes				67	≥60	≥50	≥40	>35	63	63.6	1.85	185	II	II	II/III	a-yes				studied	studied	CC	CC	studied	CC	CC
male	45	<60	<60		<60	controls			Controls	Bulgarian											<65							<60															studied	studied	CC	CC	studied	CC	CC
male	63	60-69	≥60		≥60	controls	controls non-smokers	controls non-smokers	Controls	Bulgarian				non smokers	non smokers	non smokers	non/ex-smokers				<65			pnevmonija				≥60															studied	studied	CC	CC	studied	CC	CC
female	63	60-69	≥60		≥60	controls	controls currenmt smok	controls currenmt smok	Controls	Bulgarian	1.78	98	44	current smokers	current smokers	ex/current sm	current smokers	no			<65			zdrav				≥60															studied	studied	CC	CC	studied	CC	CC
female	57	<60	<60		<60	COPD	COPD	COPD nonsmokers	Patients	Bulgarian	1.56	78		non smokers	non smokers	non smokers	non/ex-smokers		8	≥4 median	<65			AH/HIBS			49	<60	<50	≥40	>35	62	46.3	2.55	255	II	II	II/III	b-no	no	NO	yes	studied	studied	GC	CG/GG	studied	CC	CC
female	50	<60	<60		<60	controls	controls currenmt smok	controls currenmt smok	Controls	Bulgarian	1.7	70	30	current smokers	current smokers	ex/current sm	current smokers	no			<65																			no		no	studied	studied	GC	CG/GG	studied	CC	CC
female	62	60-69	≥60		≥60	COPD	COPD	COPD nonsmokers	Patients	Bulgarian	1.5	72		non smokers	non smokers	non smokers	non/ex-smokers	no	5	≥4 median	<65						57	<60	≥50	≥40	>35	47	64.4	2.03	203	III	III/IV	II/III					studied	studied	GC	CG/GG	studied	CC	CC
female	40	<60	<60		<60	COPD	COPD	COPD current smokers	Patients	Bulgarian	1.68	59	5	current smokers	current smokers	ex/current sm	current smokers	no	0.08	< 4 median	<65						39.92	<60	<50	<40	>35	79	70	3.86	386	II	II	II/III	b-no	no	NO	no	studied	studied	GC	CG/GG	studied	CT	CT/TT
female	50	<60	<60		<60	COPD	COPD	COPD current smokers	Patients	Bulgarian	1.88	75	40	current smokers	current smokers	ex/current sm	current smokers		0.2	< 4 median	<65			jazva-12			49.8	<60	<50	≥40	>35	48	69	2.56	256	III	III/IV	II/III	b-no	no	NO	yes	studied	studied	GC	CG/GG	studied	CT	CT/TT
female	58	<60	<60		<60	COPD	COPD	COPD ex-smokers	Patients	Bulgarian	1.7	73	30	ex-smokers	ex-smokers	ex/current sm	non/ex-smokers	no	0	< 4 median	<65						58	<60	≥50	≥40	>35	34	70	1.82	182	III	III/IV	II/III	b-no	no	NO	no	studied	studied	GC	CG/GG	studied	CT	CT/TT
female	57	<60	<60		<60	controls	controls ex-smokers	controls ex-smokers	Controls	Bulgarian	1.7	115	34	ex-smokers	ex-smokers	ex/current sm	non/ex-smokers	no																						no			studied	studied	GC	CG/GG	studied	CT	CT/TT
female	64	60-69	≥60		≥60	COPD	COPD	COPD ex-smokers	Patients	Bulgarian	1.85	85	18	ex-smokers	ex-smokers	ex/current sm	non/ex-smokers	no	2	< 4 median	<65	a-yes	yes	AH,D	2	lysinopril	62	≥60	≥50	≥40	>35	64	63.22			II	II	II/III	a-yes	yes	YES	yes	studied	studied	GC	CG/GG	studied	CT	CT/TT
female	64	60-69	≥60		≥60	controls	controls non-smokers	controls non-smokers	Controls	Bulgarian	1.62	68		non smokers	non smokers	non smokers	non/ex-smokers				<65			D	10	amaryl		≥60												yes	YES	yes	studied	studied	GC	CG/GG	studied	CT	CT/TT
female	70	≥70	≥60		≥60	controls	controls non-smokers	controls non-smokers	Controls	Bulgarian	1.65	82		non smokers	non smokers	non smokers	non/ex-smokers				≥65			D	1			≥60												yes	YES	yes	studied	studied	GC	CG/GG	studied	CT	CT/TT
female	72	≥70	≥60		≥60	COPD	COPD	COPD current smokers	Patients	Bulgarian	1.6	63	20	current smokers	current smokers	ex/current sm	current smokers	no	2	< 4 median	≥65						70	≥60	≥50	≥40	>35	77	70	2.03	203	II	II	II/III					studied	studied	GC	CG/GG	studied	CT	CT/TT
female	62	60-69	≥60		≥60	COPD	COPD	COPD ex-smokers	Patients	Bulgarian	1.7	60	30	ex-smokers	ex-smokers	ex/current sm	non/ex-smokers		15	≥4 median	<65						47	<60	<50	≥40	>35	15	42	1.71	171	IV	III/IV	IV					studied	studied	GC	CG/GG	studied	CT	CT/TT
male	49	<60	<60		<60	controls	controls non-smokers	controls non-smokers	Controls	Bulgarian	1.76	74		non smokers	non smokers	non smokers	non/ex-smokers				<65			vibracionna bolest	7			<60														yes	studied	studied	GC	CG/GG	studied	CT	CT/TT
male	52	<60	<60		<60	controls			Controls	Bulgarian											<65							<60															studied	studied	GC	CG/GG	studied	CT	CT/TT
male	49	<60	<60		<60	controls			Controls	Bulgarian											<65			zdrav				<60															studied	studied	GC	CG/GG	studied	CT	CT/TT
male	59	<60	<60		<60	controls			Controls	Bulgarian											<65							<60															studied	studied	GC	CG/GG	studied	CT	CT/TT
male	63	60-69	≥60		≥60	controls	controls non-smokers	controls non-smokers	Controls	Bulgarian	1.8	102		non smokers	non smokers	non smokers	non/ex-smokers	no			<65																			no		no	studied	studied	GG	CG/GG	studied	CT	CT/TT
female	59	<60	<60		<60	COPD	COPD	COPD ex-smokers	Patients	Bulgarian	1.76	82	40	ex-smokers	ex-smokers	ex/current sm	non/ex-smokers	no	4	≥4 median	<65	a-yes	yes				55	<60	≥50	≥40	>35	58	68	2.08	208	II	II	II/III	a-yes	no	NO	no	studied	studied	CC	CC	studied	CC	CC
female	59	<60	<60		<60	COPD	COPD	COPD current smokers	Patients	Bulgarian	1.75	75	15	current smokers	current smokers	ex/current sm	current smokers		5	≥4 median	<65			AH			54	<60	≥50	≥40	>35	58	63	1.84	184	II	II	II/III	b-no	no	NO	yes	studied	studied	CC	CC	studied	CC	CC
male	78	≥70	≥60		≥60	COPD	COPD	COPD nonsmokers	Patients	Bulgarian	1.75	70		non smokers	non smokers	non smokers	non/ex-smokers	no	6	≥4 median	≥65	a-yes	yes	HSSN/AH			72	≥60	≥50	≥40	>35	51	68	1.84	184	II	II	II/III	a-yes	no	NO	yes	studied	studied	CC	CC	studied	CC	CC
female	69	60-69	≥60		≥60	COPD	COPD	COPD ex-smokers	Patients	Bulgarian	1.75	80	12	ex-smokers	ex-smokers	ex/current sm	non/ex-smokers	no	4	≥4 median	≥65	a-yes	yes	AH,IBS,gastroduodenit	1	losartan	65	≥60	≥50	≥40	>35	49	65.88			II	II	II/III	a-yes	no	YES	yes	studied	studied	CC	CC	studied	CC	CC
male	66	60-69	≥60		≥60	COPD	COPD	COPD nonsmokers	Patients	Bulgarian	1.67	85		non smokers	non smokers	non smokers	non/ex-smokers	no	1	< 4 median	≥65			HIBS			65	≥60	≥50	≥40	>35	71.4	67.3	3.27	327	II	II	II/III	b-no	no	NO	yes	studied	studied	CC	CC	studied	CC	CC
female	72	≥70	≥60		≥60	COPD	COPD	COPD nonsmokers	Patients	Bulgarian	1.54	75		non smokers	non smokers	non smokers	non/ex-smokers	no	0	< 4 median	≥65						72	≥60	≥50	≥40	>35	56	64	1.2	120	II	II	II/III	b-no	no	NO	no	studied	studied	CC	CC	studied	CC	CC
female	58	<60	<60		<60	COPD	COPD	COPD ex-smokers	Patients	Bulgarian	1.8	86	23	ex-smokers	ex-smokers	ex/current sm	non/ex-smokers	no	6	≥4 median	<65	a-yes	yes	AH			52	<60	≥50	≥40	>35	43	45.7	1.64	164	III	III/IV	II/III	a-yes	no	NO	yes	studied	studied	CC	CC	studied	CC	CC
male	75	≥70	≥60		≥60	COPD	COPD	COPD nonsmokers	Patients	Bulgarian	1.72	85		non smokers	non smokers	non smokers	non/ex-smokers	no	10	≥4 median	≥65	a-yes	yes	D/AH/HSSN/MI/katarakta			65	≥60	≥50	≥40	>35	46	66	1.26	126	III	III/IV	II/III	b-no	no	NO	no	studied	studied	CC	CC	studied	CC	CC
female	74	≥70	≥60		≥60	COPD	COPD	COPD ex-smokers	Patients	Bulgarian	1.78	95	20	ex-smokers	ex-smokers	ex/current sm	non/ex-smokers	no	10	≥4 median	≥65	a-yes	yes	AH			64	≥60	≥50	≥40	>35	48	57.1	2.38	238	III	III/IV	II/III	a-yes	no	NO	yes	studied	studied	CC	CC	studied	CC	CC
female	70	≥70	≥60		≥60	COPD	COPD	COPD ex-smokers	Patients	Bulgarian	1.75	88	30	ex-smokers	ex-smokers	ex/current sm	non/ex-smokers	no	2.1	< 4 median	≥65			AH/HSSN			67.9	≥60	≥50	≥40	>35	49	61.6	1.53	153	III	III/IV	II/III	b-no	no	YES	yes	studied	studied	CC	CC	studied	CC	CC
female	74	≥70	≥60		≥60	COPD	COPD	COPD ex-smokers	Patients	Bulgarian			30	ex-smokers	ex-smokers	ex/current sm	non/ex-smokers	no	1	< 4 median	≥65			AH			73	≥60	≥50	≥40	>35	49	61	1.69	169	III	III/IV	II/III	b-no	no	NO	yes	studied	studied	CC	CC	studied	CC	CC
female	82	≥70	≥60		≥60	COPD	COPD	COPD current smokers	Patients	Bulgarian	1.67	68	50	current smokers	current smokers	ex/current sm	current smokers		19	≥4 median	≥65			HIBS/???			63	≥60	≥50	≥40	>35	48	46.2	1.5	150	III	III/IV	II/III	b-no	no	NO	yes	studied	studied	CC	CC	studied	CC	CC
male	64	60-69	≥60		≥60	controls	controls non-smokers	controls non-smokers	Controls	Bulgarian				non smokers	non smokers	non smokers	non/ex-smokers				<65			tireotoksikoza	2			≥60												no	YES	yes	studied	studied	CC	CC	studied	CC	CC
male	55	<60	<60		<60	COPD	COPD	COPD nonsmokers	Patients	Bulgarian	1.72	100		non smokers	non smokers	non smokers	non/ex-smokers	no	18	≥4 median	<65	a-yes	yes	D/AH/HIBS/HSSN/			37	<60	<50	<40	>35	70	68	3.03	303	II	II	II/III	a-yes	yes	YES	yes	studied	studied	CC	CC	studied	CC	CC
female	75	≥70	≥60		≥60	COPD	COPD	COPD ex-smokers	Patients	Bulgarian	1.65	64	10	ex-smokers	ex-smokers	ex/current sm	non/ex-smokers	yes	4	≥4 median	≥65	a-yes	yes	AH,D2	4	valtansin	71	≥60	≥50	≥40	>35	45	69.15			II	II	II/III	a-yes	yes	YES	yes	studied	studied	CC	CC	studied	CC	CC
male	52	<60	<60		<60	controls	controls non-smokers	controls non-smokers	Controls	Bulgarian	1.7	82		non smokers	non smokers	non smokers	non/ex-smokers				<65			D/AH	3	insulin		<60												yes	YES	yes	studied	studied	CC	CC	studied	CC	CC
female	47	<60	<60		<60	controls	controls non-smokers	controls non-smokers	Controls	Bulgarian	1.65	72		non smokers	non smokers	non smokers	non/ex-smokers				<65			D/AH	5	insulin		<60												yes	YES	yes	studied	studied	CC	CC	studied	CC	CC
female	51	<60	<60		<60	controls	controls currenmt smok	controls currenmt smok	Controls	Bulgarian	1.76	80	20	current smokers	current smokers	ex/current sm	current smokers				<65			D	10	sinfor		<60												yes	YES	yes	studied	studied	CC	CC	studied	CC	CC
female	67	60-69	≥60		≥60	controls	controls non-smokers	controls non-smokers	Controls	Bulgarian	1.69	76		non smokers	non smokers	non smokers	non/ex-smokers				≥65			D	27	insulin		≥60												yes	YES	yes	studied	studied	CC	CC	studied	CC	CC
female	75	≥70	≥60		≥60	controls	controls non-smokers	controls non-smokers	Controls	Bulgarian	1.6	75		non smokers	non smokers	non smokers	non/ex-smokers				≥65			D	18	insulin		≥60												yes	YES	yes	studied	studied	CC	CC	studied	CC	CC
female	56	<60	<60		<60	COPD	COPD	COPD current smokers	Patients	Bulgarian	1.74	77	30	current smokers	current smokers	ex/current sm	current smokers		5	≥4 median	<65						51	<60	≥50	≥40	>35	60	67.9	2.13	213	II	II	II/III					studied	studied	CC	CC	studied	CC	CC
female	73	≥70	≥60		≥60	COPD	COPD	COPD ex-smokers	Patients	Bulgarian	1.65	54	10	ex-smokers	ex-smokers	ex/current sm	non/ex-smokers	no	1.8	< 4 median	≥65			AH, Hiperchol				≥60			>35	61	75			II	II	II/III					studied	studied	CC	CC	studied	CC	CC
female	56	<60	<60		<60	controls	controls non-smokers	controls non-smokers	Controls	Bulgarian	1.55	65		non smokers	non smokers	non smokers	non/ex-smokers	no			<65			zdrav				<60															studied	studied	CC	CC	studied	CC	CC
female	57	<60	<60		<60	controls	controls non-smokers	controls non-smokers	Controls	Bulgarian	1.65	103		non smokers	non smokers	non smokers	non/ex-smokers				<65			zatlastyavane		dieta		<60														yes	studied	studied	CC	CC	studied	CC	CC
male	46	<60	<60		<60	controls			Controls	Bulgarian											<65			zdrav				<60															studied	studied	CC	CC	studied	CC	CC
male	78	≥70	≥60		≥60	controls	controls non-smokers	controls non-smokers	Controls	Bulgarian	1.7	95		non smokers	non smokers	non smokers	non/ex-smokers	no			≥65			zdrav				≥60															studied	studied	CC	CC	studied	CC	CC
male	73	≥70	≥60		≥60	controls			Controls	Bulgarian											≥65							≥60															studied	studied	CC	CC	studied	CC	CC
female	56	<60	<60		<60	COPD	COPD	COPD current smokers	Patients	Bulgarian	1.52	78	20	current smokers	current smokers	ex/current sm	current smokers	no	4	≥4 median	<65						52	<60	≥50	≥40	>35	52	64	2.51	251	II	II	II/III	b-no	no	NO	no	studied	studied	GC	CG/GG	studied	CC	CC
female	68	60-69	≥60		≥60	COPD	COPD	COPD ex-smokers	Patients	Bulgarian	1.8	93	60	ex-smokers	ex-smokers	ex/current sm	non/ex-smokers	no	2	< 4 median	≥65	a-yes	yes	AH, IKMP, dyslipidemia	2	lorystan	66	≥60	≥50	≥40	>35	50	57.32			II	II	II/III	a-yes	no	YES	yes	studied	studied	GC	CG/GG	studied	CC	CC
male	88	≥70	≥60		≥60	COPD	COPD	COPD nonsmokers	Patients	Bulgarian	1.7	60		non smokers	non smokers	non smokers	non/ex-smokers		2	< 4 median	≥65						86	≥60	≥50	≥40	>35	35	47.1	1.02	102	III	III/IV	II/III	b-no	no	NO	no	studied	studied	GC	CG/GG	studied	CC	CC
female	66	60-69	≥60		≥60	COPD	COPD	COPD ex-smokers	Patients	Bulgarian	1.7	82	50	ex-smokers	ex-smokers	ex/current sm	non/ex-smokers	no	10	≥4 median	≥65						56	<60	≥50	≥40		48	60.6	1.84	184	III	III/IV	II/III					studied	studied	GC	CG/GG	studied	CC	CC
female	62	60-69	≥60		≥60	controls	controls non-smokers	controls non-smokers	Controls	Bulgarian	1.6	58		non smokers	non smokers	non smokers	non/ex-smokers	no			<65			zdrav				≥60															studied	studied	GC	CG/GG	studied	CC	CC
male	37	<60	<60		<60	controls	controls non-smokers	controls non-smokers	Controls	Bulgarian	1.75	80		non smokers	non smokers	non smokers	non/ex-smokers				<65			D	1	insulin		<60												yes	YES	yes	studied	studied	CC	CC	studied	CT	CT/TT
male	53	<60	<60		<60	controls			Controls	Bulgarian											<65			D	2	insulin		<60												yes	YES	yes	studied	studied	CC	CC	studied	CT	CT/TT
male	60	60-69	≥60		≥60	controls	controls non-smokers	controls non-smokers	Controls	other (Turkish)	1.68	62		non smokers	non smokers	non smokers	non/ex-smokers				<65			idiopatichen hipoparatireoidizym	4			≥60														yes	studied	studied	CC	CC	studied	CT	CT/TT
female	63	60-69	≥60		≥60	COPD	COPD	COPD ex-smokers	Patients	Bulgarian	1.68	83	40	ex-smokers	ex-smokers	ex/current sm	non/ex-smokers	no	6	≥4 median	<65	a-yes	yes	AH,IBS		enalapril	57	<60	≥50	≥40	>35	55	58.28			II	II	II/III	a-yes	no	YES	yes	studied	studied	GC	CG/GG	studied	CT	CT/TT
female	66	60-69	≥60		≥60	COPD	COPD	COPD current smokers	Patients	Bulgarian	1.55	72	60	current smokers	current smokers	ex/current sm	current smokers	no	1.5	< 4 median	≥65			AH			64.5	≥60	≥50	≥40	>35	48	57	2.14	214	III	III/IV	II/III	b-no	no	NO	yes	studied	studied	GC	CG/GG	studied	CT	CT/TT
female	54	<60	<60		<60	COPD	COPD	COPD ex-smokers	Patients	Bulgarian	1.6	59	40	ex-smokers	ex-smokers	ex/current sm	non/ex-smokers	no	4	≥4 median	<65	a-yes	yes	AH			50	<60	<50	≥40	>35	26	37.1	2.07	207	IV	III/IV	IV	a-yes	no	NO	yes	studied	studied	GC	CG/GG	studied	CT	CT/TT
female	23	<60	<60		<60	controls	controls non-smokers	controls non-smokers	Controls	Bulgarian				non smokers	non smokers	non smokers	non/ex-smokers				<65			hipotireoidoza				<60												no	YES	yes	studied	studied	GC	CG/GG	studied	CT	CT/TT
female	42	<60	<60		<60	controls	controls currenmt smok	controls currenmt smok	Controls	Bulgarian	1.8	65	20	current smokers	current smokers	ex/current sm	current smokers	yes			<65																			no		no	studied	studied	GC	CG/GG	studied	CT	CT/TT
female	43	<60	<60		<60	controls	controls currenmt smok	controls currenmt smok	Controls	Bulgarian	1.56	60	22	current smokers	current smokers	ex/current sm	current smokers				<65			D	40	insulin		<60												yes	YES	yes	studied	studied	GC	CG/GG	studied	CT	CT/TT
male	57	<60	<60		<60	controls	controls non-smokers	controls non-smokers	Controls	Bulgarian	1.62	65		non smokers	non smokers	non smokers	non/ex-smokers	no			<65			zdrav				<60															studied	studied	GC	CG/GG	studied	CT	CT/TT
female	57	<60	<60		<60	controls	controls currenmt smok	controls currenmt smok	Controls	Bulgarian	1.62	78	35	current smokers	current smokers	ex/current sm	current smokers				<65			pneumonia				<60														yes	studied	studied	GC	CG/GG	studied	CT	CT/TT
female	69	60-69	≥60		≥60	COPD	COPD	COPD ex-smokers	Patients	Bulgarian	1.68	70	50	ex-smokers	ex-smokers	ex/current sm	non/ex-smokers	no	4.5	≥4 median	≥65			D/HIBS/AH/HSSN/			64.5	≥60	≥50	≥40	>35	52	70	3.02	302	II	II	II/III	b-no	yes	YES	yes	studied	studied	GG	CG/GG	studied	CT	CT/TT
male	30	<60	<60		<60	controls			Controls	Bulgarian											<65							<60															studied	studied	GG	CG/GG	studied	CT	CT/TT
female	62	60-69	≥60		≥60	controls	controls non-smokers	controls non-smokers	Controls	Bulgarian	1.58	69		non smokers	non smokers	non smokers	non/ex-smokers				<65			D	22	insulin		≥60												yes	YES	yes	studied	studied	GG	CG/GG	studied	TT	CT/TT
female	54	<60	<60		<60	controls	controls ex-smokers	controls ex-smokers	Controls	Bulgarian	1.8	72	25	ex-smokers	ex-smokers	ex/current sm	non/ex-smokers				<65			pneumonia	0.04	antibiotics		<60														yes	studied	studied	GG	CG/GG	studied	TT	CT/TT
female	50	<60	<60		<60	controls	controls currenmt smok	controls currenmt smok	Controls	Bulgarian	1.75	83	12	current smokers	current smokers	ex/current sm	current smokers	no			<65			zdrav				≥60															studied	studied	GG	CG/GG	studied	TT	CT/TT
female	49	<60	<60		<60	COPD	COPD	COPD nonsmokers	Patients	Bulgarian	1.55	117		non smokers	non smokers	non smokers	non/ex-smokers	no	2	< 4 median	<65			AH/HIBS/sarkoidoza			47	<60	<50	≥40	>35	72	67	2.75	275	II	II	II/III	b-no	no	YES	yes	studied	non			studied	CT	CT/TT
female	56	<60	<60		<60	COPD	COPD	COPD ex-smokers	Patients	Bulgarian	1.8	94	22	ex-smokers	ex-smokers	ex/current sm	non/ex-smokers		2	< 4 median	<65	a-yes	yes	AH			54	<60	≥50	≥40	>35	37	66.3	4.17	417	III	III/IV	II/III	a-yes	no	NO	yes	studied	non			non
female	47	<60	<60		<60	controls	controls non-smokers	controls non-smokers	Controls	Bulgarian	1.61	58		non smokers	non smokers	non smokers	non/ex-smokers				<65			zdrav				<60												no	NO	no	studied	non			non
female	62	60-69	≥60		≥60	controls	controls currenmt smok	controls currenmt smok	Controls	Bulgarian	1.59	50	40	current smokers	current smokers	ex/current sm	current smokers				<65			zdrava				≥60												no	NO	yes	studied	non			non
female	55	<60	<60		<60	COPD	COPD	COPD ex-smokers	Patients	Bulgarian	1.75	55	19	ex-smokers	ex-smokers	ex/current sm	non/ex-smokers	no	1	< 4 median	<65	a-yes	yes	AH,HIBS, hiperholesterolemia	7	nordipin	54	<60	≥50	≥40	>35	62	68.13			II	II	II/III	a-yes	no	YES	yes	studied	studied	CC	CC	studied	CC	CC
female	59	<60	<60		<60	COPD	COPD	COPD current smokers	Patients	Bulgarian	1.75	73	16	current smokers	current smokers	ex/current sm	current smokers	no	3	< 4 median	<65						56	<60	≥50	≥40	>35	56	65.85			II	II	II/III	a-yes	no	YES	yes	studied	studied	CC	CC	studied	CC	CC
female	52	<60	<60		<60	COPD	COPD	COPD current smokers	Patients	Bulgarian	1.76	93	60	current smokers	current smokers	ex/current sm	current smokers	no	1	< 4 median	<65						51	<60	≥50	≥40	>35	64	68	4.79	479	II	II	II/III	b-no	no	NO	no	studied	studied	CC	CC	studied	CC	CC
female	60	60-69	≥60		≥60	COPD	COPD	COPD ex-smokers	Patients	Bulgarian	1.68	85	88	ex-smokers	ex-smokers	ex/current sm	non/ex-smokers	no	5	≥4 median	<65	a-yes	yes	AH, IBS, HANC, MI, dislipidemia	5	miokardis	67	≥60	≥50	≥40	>35	50	62.14			II	II	II/III	a-yes	no	YES	yes	studied	studied	CC	CC	studied	CC	CC
male	77	≥70	≥60		≥60	COPD	COPD	COPD nonsmokers	Patients	Bulgarian	1.65	80		non smokers	non smokers	non smokers	non/ex-smokers	no	6	≥4 median	≥65	a-yes	yes	Belodrobni/HBN/Bradikardija			71	≥60	≥50	≥40	>35	57.2	62	2.29	229	II	II	II/III	a-yes	no	NO	yes	studied	studied	CC	CC	studied	CC	CC
female	72	≥70	≥60		≥60	COPD	COPD	COPD ex-smokers	Patients	Bulgarian	1.45	55	15	ex-smokers	ex-smokers	ex/current sm	non/ex-smokers		10	≥4 median	≥65	a-yes	yes				62	≥60	≥50	≥40	>35	51	42	2.31	231	II	II	II/III	a-yes	no	NO		studied	studied	CC	CC	studied	CC	CC
male	71	≥70	≥60		≥60	COPD	COPD	COPD nonsmokers	Patients	Bulgarian	1.66	67		non smokers	non smokers	non smokers	non/ex-smokers		1	< 4 median	≥65						70	≥60	≥50	≥40	>35	54	58.2	2.07	207	II	II	II/III	b-no	no	NO	no	studied	studied	CC	CC	studied	CC	CC
female	77	≥70	≥60		≥60	COPD	COPD	COPD ex-smokers	Patients	Bulgarian	1.7	55	5	ex-smokers	ex-smokers	ex/current sm	non/ex-smokers	no	3	< 4 median	≥65						74	≥60	≥50	≥40	>35	56.4	61	2.79	279	II	II	II/III	b-no	no	NO		studied	studied	CC	CC	studied	CC	CC
female	77	≥70	≥60		≥60	COPD	COPD	COPD nonsmokers	Patients	Bulgarian	1.57	52		non smokers	non smokers	non smokers	non/ex-smokers		10	≥4 median	≥65			AH/HSSN			67	≥60	≥50	≥40	>35	50	54.7	0.79	79	II	II	II/III	b-no	no	NO	yes	studied	studied	CC	CC	studied	CC	CC
female	77	≥70	≥60		≥60	COPD	COPD	COPD nonsmokers	Patients	Bulgarian	1.62	74		non smokers	non smokers	non smokers	non/ex-smokers		4	≥4 median	≥65			silikoza			73	≥60	≥50	≥40	>35	54	62	1.82	182	II	II	II/III	b-no	no	YES	yes	studied	studied	CC	CC	studied	CC	CC
female	73	≥70	≥60		≥60	COPD	COPD	COPD ex-smokers	Patients	Bulgarian	1.76	83	20	ex-smokers	ex-smokers	ex/current sm	non/ex-smokers	no	8	≥4 median	≥65			AH/HIBS/HSSN			65	≥60	≥50	≥40	>35	67	62.4	4.21	421	II	II	II/III	b-no	no	NO	yes	studied	studied	CC	CC	studied	CC	CC
female	81	≥70	≥60		≥60	COPD	COPD	COPD ex-smokers	Patients	Bulgarian			10	ex-smokers	ex-smokers	ex/current sm	non/ex-smokers	no			≥65	a-yes	yes	HBN,nephritis, anaemia				≥60			>35					II	II	II/III		no	YES	yes	studied	studied	CC	CC	studied	CC	CC
male	65	60-69	≥60		≥60	COPD	COPD	COPD nonsmokers	Patients	Bulgarian	1.66	64		non smokers	non smokers	non smokers	non/ex-smokers	no	10	≥4 median	≥65	a-yes	yes	AH, Rejno			55	<60	≥50	≥40	>35	33.3	49.6	2.01	201	III	III/IV	II/III	a-yes	no	YES	yes	studied	studied	CC	CC	studied	CC	CC
female	67	60-69	≥60		≥60	COPD	COPD	COPD nonsmokers	Patients	Bulgarian	1.56	65		non smokers	non smokers	non smokers	non/ex-smokers		10	≥4 median	≥65	a-yes	yes				57	<60	≥50	≥40	>35	49	49.2	2.5	250	III	III/IV	II/III	a-yes	no	NO	no	studied	studied	CC	CC	studied	CC	CC
female	55	<60	<60		<60	COPD	COPD	COPD current smokers	Patients	Bulgarian	1.72	70	18	current smokers	current smokers	ex/current sm	current smokers		4	≥4 median	<65						51	<60	≥50	≥40	>35	36	52.1	2.14	214	III	III/IV	II/III	a-yes	no	NO	no	studied	studied	CC	CC	studied	CC	CC
female	63	60-69	≥60		≥60	COPD	COPD	COPD current smokers	Patients	Bulgarian	1.63	75	40	current smokers	current smokers	ex/current sm	current smokers	yes	3	< 4 median	<65	a-yes	yes	AH/HSSN/Glaukoma			60	≥60	≥50	≥40	>35	37	43	1.04	104	III	III/IV	II/III	a-yes	no	YES	yes	studied	studied	CC	CC	studied	CC	CC
female	69	60-69	≥60		≥60	COPD	COPD	COPD ex-smokers	Patients	Bulgarian	1.68	85		ex-smokers	ex-smokers	ex/current sm	non/ex-smokers		0.1	< 4 median	≥65	a-yes	yes				68.9	≥60	≥50	≥40	>35	40	67	2.13	213	III	III/IV	II/III	a-yes	no	NO	no	studied	studied	CC	CC	studied	CC	CC
female	73	≥70	≥60		≥60	COPD	COPD	COPD ex-smokers	Patients	Bulgarian	1.85	86	10	ex-smokers	ex-smokers	ex/current sm	non/ex-smokers		5	≥4 median	≥65	a-yes	yes				68	≥60	≥50	≥40	>35	49	61.6	4.05	405	III	III/IV	II/III	a-yes	no	NO	no	studied	studied	CC	CC	studied	CC	CC
female	78	≥70	≥60		≥60	COPD	COPD	COPD ex-smokers	Patients	Bulgarian	1.7	89	20	ex-smokers	ex-smokers	ex/current sm	non/ex-smokers	no	13	≥4 median	≥65	a-yes	yes	AH			65	≥60	≥50	≥40	>35	46	65.7	2.14	214	III	III/IV	II/III	a-yes	no	NO	yes	studied	studied	CC	CC	studied	CC	CC
female	72	≥70	≥60		≥60	COPD	COPD	COPD ex-smokers	Patients	Bulgarian	1.68	70	50	ex-smokers	ex-smokers	ex/current sm	non/ex-smokers	no	0	< 4 median	≥65						72	≥60	≥50	≥40	>35	40	64	1.22	122	III	III/IV	II/III	b-no	no	NO	no	studied	studied	CC	CC	studied	CC	CC
male	76	≥70	≥60		≥60	COPD	COPD	COPD nonsmokers	Patients	Bulgarian	1.7	82		non smokers	non smokers	non smokers	non/ex-smokers		7	≥4 median	≥65			Behterev			69	≥60	≥50	≥40	>35	48	38.7	2.73	273	III	III/IV	II/III	b-no	no	NO	yes	studied	studied	CC	CC	studied	CC	CC
female	84	≥70	≥60		≥60	COPD	COPD	COPD ex-smokers	Patients	Bulgarian	1.67	60	40	ex-smokers	ex-smokers	ex/current sm	non/ex-smokers		15	≥4 median	≥65			HSSN			69	≥60	≥50	≥40	>35	38	53.3	2.44	244	III	III/IV	II/III	b-no	no	NO	yes	studied	studied	CC	CC	studied	CC	CC
female	59	<60	<60		<60	COPD	COPD	COPD ex-smokers	Patients	Bulgarian			15	ex-smokers	ex-smokers	ex/current sm	non/ex-smokers				<65						46	<60	<50	≥40						III	III/IV	II/III	b-no	no	NO		studied	studied	CC	CC	studied	CC	CC
male	55	<60	<60		<60	COPD			Patients	Bulgarian											<65						52	<60	≥50	≥40						III	III/IV	II/III	b-no	no	NO		studied	studied	CC	CC	studied	CC	CC
female	71	≥70	≥60		≥60	COPD	COPD	COPD current smokers	Patients	Bulgarian	1.7	55	50	current smokers	current smokers	ex/current sm	current smokers	no	0.5	< 4 median	≥65	a-yes	yes	HDihN/AH/			70.5	≥60	≥50	≥40	>35	25	46	1.76	176	IV	III/IV	IV	a-yes	no	NO	yes	studied	studied	CC	CC	studied	CC	CC
male	77	≥70	≥60		≥60	COPD	COPD	COPD nonsmokers	Patients	Bulgarian	1.7	50		non smokers	non smokers	non smokers	non/ex-smokers	no	17	≥4 median	≥65			HDN/pnevmoskleroza			60	≥60	≥50	≥40	>35	28	62	1.04	104	IV	III/IV	IV	b-no	no	NO	yes	studied	studied	CC	CC	studied	CC	CC
male	57	<60	<60		<60	controls	controls non-smokers	controls non-smokers						non smokers	non smokers	non smokers	non/ex-smokers				<65							<60				100	76.4							no			studied	studied	CC	CC	studied	CC	CC
female	58	<60	<60		<60	controls	controls non-smokers	controls non-smokers	Controls	Bulgarian				non smokers	non smokers	non smokers	non/ex-smokers				<65			hipotireoidoza	4			<60												no	YES	yes	studied	studied	CC	CC	studied	CC	CC
female	47	<60	<60		<60	controls	controls non-smokers	controls non-smokers	Controls	Bulgarian	1.6	52		non smokers	non smokers	non smokers	non/ex-smokers				<65							<60												no	NO	no	studied	studied	CC	CC	studied	CC	CC
female	56	<60	<60		<60	controls	controls ex-smokers	controls ex-smokers						ex-smokers	ex-smokers	ex/current sm	non/ex-smokers				<65							<60				122	75.9							no			studied	studied	CC	CC	studied	CC	CC
female	41	<60	<60		<60	controls	controls currenmt smok	controls currenmt smok	Controls	Bulgarian	1.8	78	20	current smokers	current smokers	ex/current sm	current smokers				<65			zdrav				<60												no	NO	no	studied	studied	CC	CC	studied	CC	CC
female	23	<60	<60		<60	controls	controls currenmt smok	controls currenmt smok						current smokers	current smokers	ex/current sm	current smokers				<65							<60				132	83							no			studied	studied	CC	CC	studied	CC	CC
female	26	<60	<60		<60	controls	controls currenmt smok	controls currenmt smok	Controls	Bulgarian	1.64	70	10	current smokers	current smokers	ex/current sm	current smokers	no			<65			zdrav				<60												no	NO	no	studied	studied	CC	CC	studied	CC	CC
female	70	≥70	≥60	≥12	≥60	controls	controls non-smokers	controls non-smokers	Controls		1.58	72.4		non smokers	non smokers	non smokers	non/ex-smokers				≥65			AH/Stenokardija/Glaukoma				≥60												no			studied	studied	CC	CC	studied	CC	CC
male	67	60-69	≥60		≥60	controls	controls non-smokers	controls non-smokers						non smokers	non smokers	non smokers	non/ex-smokers				≥65							≥60				115	78.4							no			studied	studied	CC	CC	studied	CC	CC
female	66	60-69	≥60		≥60	controls	controls non-smokers	controls non-smokers						non smokers	non smokers	non smokers	non/ex-smokers				≥65							≥60				89	82.4							no			studied	studied	CC	CC	studied	CC	CC
male	73	≥70	≥60		≥60	controls	controls non-smokers	controls non-smokers						non smokers	non smokers	non smokers	non/ex-smokers				≥65							≥60				133	77.1							no			studied	studied	CC	CC	studied	CC	CC
female	79	≥70	≥60		≥60	controls	controls non-smokers	controls non-smokers						non smokers	non smokers	non smokers	non/ex-smokers				≥65							≥60				80	78.6							no			studied	studied	CC	CC	studied	CC	CC
female	70	≥70	≥60		≥60	controls	controls non-smokers	controls non-smokers						non smokers	non smokers	non smokers	non/ex-smokers				≥65							≥60				92	75.5							no			studied	studied	CC	CC	studied	CC	CC
female	69	60-69	≥60		≥60	controls	controls ex-smokers	controls ex-smokers						ex-smokers	ex-smokers	ex/current sm	non/ex-smokers				≥65							≥60				83	71.3							no			studied	studied	CC	CC	studied	CC	CC
female	76	≥70	≥60		≥60	controls	controls ex-smokers	controls ex-smokers						ex-smokers	ex-smokers	ex/current sm	non/ex-smokers				≥65							≥60				106	73							no			studied	studied	CC	CC	studied	CC	CC
female	76	≥70	≥60		≥60	controls	controls currenmt smok	controls currenmt smok						current smokers	current smokers	ex/current sm	current smokers				≥65							≥60				82	73.6							no			studied	studied	CC	CC	studied	CC	CC
male	49	<60	<60		<60	controls	controls non-smokers	controls non-smokers	Controls	Bulgarian	1.78	85		non smokers	non smokers	non smokers	non/ex-smokers	no			<65																			no		no	studied	studied	CC	CC	studied	CC	CC
female	45	<60	<60		<60	controls	controls currenmt smok	controls currenmt smok	Controls	Bulgarian	1.82	75	25	current smokers	current smokers	ex/current sm	current smokers	no			<65																			no		no	studied	studied	CC	CC	studied	CC	CC
female	55	<60	<60		<60	controls	controls currenmt smok	controls currenmt smok	Controls	Bulgarian	1.7	92	5	current smokers	current smokers	ex/current sm	current smokers	no			<65																			no		no	studied	studied	CC	CC	studied	CC	CC
female	53	<60	<60		<60	COPD	COPD	COPD current smokers	Patients	Bulgarian	1.76	90	35	current smokers	current smokers	ex/current sm	current smokers	no	2	< 4 median	<65	a-yes	yes	AH,D	2	kornifar	51	<60	≥50	≥40	>35	58	69.04			II	II	II/III	a-yes	yes	YES	yes	studied	studied	CC	CC	studied	CC	CC
male	65	60-69	≥60		≥60	COPD	COPD	COPD nonsmokers	Patients	Bulgarian	1.74	107		non smokers	non smokers	non smokers	non/ex-smokers	no	9	≥4 median	≥65			D/MI/HSSN/AH			56	<60	≥50	≥40	>35	62	68	3.46	346	II	II	II/III	b-no	yes	YES	yes	studied	studied	CC	CC	studied	CC	CC
female	71	≥70	≥60		≥60	COPD	COPD	COPD ex-smokers	Patients	Bulgarian	1.6	68	30	ex-smokers	ex-smokers	ex/current sm	non/ex-smokers	no	4	≥4 median	≥65			AH/D/HSSN			67	≥60	≥50	≥40	>35	51	67.6	2.88	288	II	II	II/III	b-no	yes	YES	yes	studied	studied	CC	CC	studied	CC	CC
female	55	<60	<60		<60	COPD	COPD	COPD ex-smokers	Patients	Bulgarian	1.6	103	15	ex-smokers	ex-smokers	ex/current sm	non/ex-smokers	no	25	≥4 median	<65	a-yes	yes	D/HIBS/AH			30	<60	<50	<40	≤35	70	68	2.86	286	II	II	II/III	a-yes	yes	YES	yes	studied	studied	CC	CC	studied	CC	CC
female	52	<60	<60		<60	controls	controls non-smokers	controls non-smokers	Controls	other (Turkish)	1.5	64		non smokers	non smokers	non smokers	non/ex-smokers				<65			D				<60												yes	YES	yes	studied	studied	CC	CC	studied	CC	CC
female	55	<60	<60		<60	controls	controls non-smokers	controls non-smokers	Controls	Bulgarian	1.6	78		non smokers	non smokers	non smokers	non/ex-smokers				<65			D		insulin		<60												yes	YES	yes	studied	studied	CC	CC	studied	CC	CC
female	63	60-69	≥60	≥12	≥60	controls	controls non-smokers	controls non-smokers	Controls		1.64	85		non smokers	non smokers	non smokers	non/ex-smokers				<65			D				≥60												yes			studied	studied	CC	CC	studied	CC	CC
female	64	60-69	≥60		≥60	controls	controls non-smokers	controls non-smokers	Controls	Bulgarian	1.52	55		non smokers	non smokers	non smokers	non/ex-smokers				<65			D/vitiligo	33	insulin		≥60												yes	YES	yes	studied	studied	CC	CC	studied	CC	CC
female	64	60-69	≥60		≥60	controls	controls non-smokers	controls non-smokers	Controls	Bulgarian	1.6	80		non smokers	non smokers	non smokers	non/ex-smokers				<65			D/IBS	4	amaryl		≥60												yes	YES	yes	studied	studied	CC	CC	studied	CC	CC
female	67	60-69	≥60		≥60	controls	controls non-smokers	controls non-smokers	Controls	Bulgarian				non smokers	non smokers	non smokers	non/ex-smokers				≥65			D	5	insulin		≥60												yes	YES	yes	studied	studied	CC	CC	studied	CC	CC
female	75	≥70	≥60		≥60	controls	controls non-smokers	controls non-smokers	Controls	Bulgarian	1.62	80		non smokers	non smokers	non smokers	non/ex-smokers				≥65			D/tireotoksikoza		maninyl		≥60												yes	YES	yes	studied	studied	CC	CC	studied	CC	CC
female	51	<60	<60		<60	COPD	COPD	COPD current smokers	Patients	Bulgarian	1.75	100	35	current smokers	current smokers	ex/current sm	current smokers	no	1	< 4 median	<65						50	<60	<50	≥40	>35	75	69.9	3.18	318	II	II	II/III					studied	studied	CC	CC	studied	CC	CC
female	77	≥70	≥60		≥60	COPD	COPD	COPD ex-smokers	Patients	Bulgarian	1.6	65	5	ex-smokers	ex-smokers	ex/current sm	non/ex-smokers	no	30	≥4 median	≥65						47	<60	<50	≥40	>35	55	70	1.68	168	II	II	II/III					studied	studied	CC	CC	studied	CC	CC
male	75	≥70	≥60		≥60	COPD	COPD	COPD nonsmokers	Patients	Bulgarian	1.73	83		non smokers	non smokers	non smokers	non/ex-smokers		10	≥4 median	≥65	a-yes	yes				65	≥60	≥50	≥40	>35	52	66.3	4.09	409	II	II	II/III	a-yes		NO	no	studied	studied	CC	CC	studied	CC	CC
female	60	60-69	≥60		≥60	COPD	COPD	COPD nonsmokers	Patients		1.54	95		non smokers	non smokers	non smokers	non/ex-smokers	no	0	< 4 median	<65						60	≥60	≥50	≥40	>35	58	70	2.3	230	II	II	II/III					studied	studied	CC	CC	studied	CC	CC
female	62	60-69	≥60		≥60	COPD	COPD	COPD ex-smokers	Patients	Bulgarian	1.76	102	10	ex-smokers	ex-smokers	ex/current sm	non/ex-smokers	no	1	< 4 median	<65						61	≥60	≥50	≥40	>35	51	65.3	3.96	396	II	II	II/III					studied	studied	CC	CC	studied	CC	CC
female	84	≥70	≥60		≥60	COPD	COPD	COPD nonsmokers	Patients	Bulgarian	1.5	65		non smokers	non smokers	non smokers	non/ex-smokers	no	1	< 4 median	≥65						83	≥60	≥50	≥40	>35	58	66	1.42	142	II	II	II/III					studied	studied	CC	CC	studied	CC	CC
female	67	60-69	≥60		≥60	COPD	COPD	COPD ex-smokers	Patients	Bulgarian	1.71	86	40	ex-smokers	ex-smokers	ex/current sm	non/ex-smokers	no	1	< 4 median	≥65						66	≥60	≥50	≥40	>35	69	64	2.48	248	II	II	II/III					studied	studied	CC	CC	studied	CC	CC
female	72	≥70	≥60		≥60	COPD	COPD	COPD current smokers	Patients	Bulgarian	1.56	56	30	current smokers	current smokers	ex/current sm	current smokers	no	1	< 4 median	≥65						71	≥60	≥50	≥40	>35	70	63	3.23	323	II	II	II/III					studied	studied	CC	CC	studied	CC	CC
female	84	≥70	≥60		≥60	COPD	COPD	COPD ex-smokers	Patients	Bulgarian	1.73	82	50	ex-smokers	ex-smokers	ex/current sm	non/ex-smokers	no	10	≥4 median	≥65						74	≥60	≥50	≥40	>35	54	62	2.45	245	II	II	II/III					studied	studied	CC	CC	studied	CC	CC
female	74	≥70	≥60		≥60	COPD	COPD	COPD current smokers	Patients	Bulgarian	1.65	66	50	current smokers	current smokers	ex/current sm	current smokers	no	1	< 4 median	≥65						73	≥60	≥50	≥40	>35	31	66	1.6	160	III	III/IV	II/III					studied	studied	CC	CC	studied	CC	CC
female	66	60-69	≥60		≥60	COPD	COPD	COPD ex-smokers	Patients	Bulgarian	1.8	115	40	ex-smokers	ex-smokers	ex/current sm	non/ex-smokers		4	≥4 median	≥65						62	≥60	≥50	≥40	>35	44	66.3	3.9	390	III	III/IV	II/III					studied	studied	CC	CC	studied	CC	CC
male	64	60-69	≥60		≥60	COPD	COPD	COPD nonsmokers	Patients	Bulgarian				non smokers	non smokers	non smokers	non/ex-smokers				<65						59	<60	≥50	≥40						III	III/IV	II/III	b-no		NO		studied	studied	CC	CC	studied	CC	CC
female	74	≥70	≥60		≥60	COPD	COPD	COPD ex-smokers	Patients	Bulgarian	1.65	70	55	ex-smokers	ex-smokers	ex/current sm	non/ex-smokers	no	8	≥4 median	≥65						66	≥60	≥50	≥40	>35	28	58	1.49	149	IV	III/IV	IV					studied	studied	CC	CC	studied	CC	CC
male	56	<60	<60		<60	controls	controls non-smokers	controls non-smokers	Controls	Bulgarian	1.83	78		non smokers	non smokers	non smokers	non/ex-smokers	no			<65			zdrav				<60															studied	studied	CC	CC	studied	CC	CC
male	49	<60	<60		<60	controls	controls non-smokers	controls non-smokers	Controls	Bulgarian	1.65	83		non smokers	non smokers	non smokers	non/ex-smokers	no			<65			zdrav				<60															studied	studied	CC	CC	studied	CC	CC
female	52	<60	<60		<60	controls	controls non-smokers	controls non-smokers	Controls	Bulgarian	1.6	62		non smokers	non smokers	non smokers	non/ex-smokers				<65			Tireoidit na Hashimoto	3			<60														yes	studied	studied	CC	CC	studied	CC	CC
female	57	<60	<60		<60	controls	controls currenmt smok	controls currenmt smok	Controls	Bulgarian	1.75	76	30	current smokers	current smokers	ex/current sm	current smokers	no			<65			zdrav				<60															studied	studied	CC	CC	studied	CC	CC
female	55	<60	<60		<60	controls	controls currenmt smok	controls currenmt smok	Controls	Bulgarian	1.6	64	5	current smokers	current smokers	ex/current sm	current smokers	no			<65			zdrav				<60															studied	studied	CC	CC	studied	CC	CC
female	52	<60	<60		<60	controls	controls currenmt smok	controls currenmt smok	Controls	Bulgarian	1.67	67	5	current smokers	current smokers	ex/current sm	current smokers	no			<65			zdrav				<60															studied	studied	CC	CC	studied	CC	CC
female	52	<60	<60		<60	controls	controls currenmt smok	controls currenmt smok	Controls	Bulgarian	1.65	68	5	current smokers	current smokers	ex/current sm	current smokers	no			<65			zdrav				<60															studied	studied	CC	CC	studied	CC	CC
female	49	<60	<60		<60	controls	controls currenmt smok	controls currenmt smok	Controls	Bulgarian	1.6	66	5	current smokers	current smokers	ex/current sm	current smokers	no			<65			ZDRAV				<60															studied	studied	CC	CC	studied	CC	CC
female	50	<60	<60		<60	controls	controls currenmt smok	controls currenmt smok	Controls	Bulgarian	1.67	80	5	current smokers	current smokers	ex/current sm	current smokers	no			<65			zdrav				<60															studied	studied	CC	CC	studied	CC	CC
male	48	<60	<60		<60	controls			Controls	Bulgarian				ex-smokers							<65			zdrav				<60															studied	studied	CC	CC	studied	CC	CC
male	58	<60	<60		<60	controls			Controls	Bulgarian											<65			NAP				<60															studied	studied	CC	CC	studied	CC	CC
male	45	<60	<60		<60	controls			Controls												<65			NAP				<60															studied	studied	CC	CC	studied	CC	CC
male	35	<60	<60		<60	controls			Controls	Bulgarian											<65							<60															studied	studied	CC	CC	studied	CC	CC
male	42	<60	<60		<60	controls			Controls												<65							<60															studied	studied	CC	CC	studied	CC	CC
male	38	<60	<60		<60	controls			Controls	Bulgarian											<65							<60															studied	studied	CC	CC	studied	CC	CC
male	50	<60	<60		<60	controls			Controls	Bulgarian											<65							<60															studied	studied	CC	CC	studied	CC	CC
male	48	<60	<60		<60	controls			Controls	Bulgarian											<65							<60															studied	studied	CC	CC	studied	CC	CC
male	50	<60	<60		<60	controls			Controls	Bulgarian											<65							<60															studied	studied	CC	CC	studied	CC	CC
male	25	<60	<60		<60	controls			Controls												<65							<60															studied	studied	CC	CC	studied	CC	CC
male	35	<60	<60		<60	controls			Controls	Bulgarian	1.65	68									<65			zdrav				<60															studied	studied	CC	CC	studied	CC	CC
female	64	60-69	≥60		≥60	controls	controls non-smokers	controls non-smokers	Controls	Bulgarian				non smokers	non smokers	non smokers	non/ex-smokers				<65			tireotoksikoza	3			≥60														yes	studied	studied	CC	CC	studied	CC	CC
female	63	60-69	≥60		≥60	controls	controls ex-smokers	controls ex-smokers	Controls	Bulgarian	1.57	70	20	ex-smokers	ex-smokers	ex/current sm	non/ex-smokers	no			<65			zdrav (insult)				≥60															studied	studied	CC	CC	studied	CC	CC
female	62	60-69	≥60		≥60	controls	controls currenmt smok	controls currenmt smok	Controls	Bulgarian	1.65	62	10	current smokers	current smokers	ex/current sm	current smokers	no			<65			zdrav				≥60															studied	studied	CC	CC	studied	CC	CC
male	73	≥70	≥60		≥60	controls	controls non-smokers	controls non-smokers	Controls	Bulgarian	1.65	62		non smokers	non smokers	non smokers	non/ex-smokers	no			≥65			bronhiektazna bolest, pnevmonija				≥60															studied	studied	CC	CC	studied	CC	CC
female	70	≥70	≥60		≥60	controls	controls non-smokers	controls non-smokers	Controls	Bulgarian	1.63	82		non smokers	non smokers	non smokers	non/ex-smokers	no			≥65			zdrav				≥60				86	79.7										studied	studied	CC	CC	studied	CC	CC
female	80	≥70	≥60		≥60	controls	controls ex-smokers	controls ex-smokers	Controls	Bulgarian	1.64	65	15	ex-smokers	ex-smokers	ex/current sm	non/ex-smokers	no			≥65			zdrav				≥60															studied	studied	CC	CC	studied	CC	CC
male	76	≥70	≥60		≥60	controls			Controls												≥65							≥60															studied	studied	CC	CC	studied	CC	CC
male	77	≥70	≥60		≥60	controls			Controls	Bulgarian											≥65			NAP				≥60															studied	studied	CC	CC	studied	CC	CC
female	65	60-69	≥60		≥60	COPD	COPD	COPD ex-smokers	Patients	Bulgarian	1.65	69	50	ex-smokers	ex-smokers	ex/current sm	non/ex-smokers	no	2	< 4 median	≥65	a-yes	yes	AH, IBS	2	lisinopril	63	≥60	≥50	≥40	>35	48	47.52			II	II	II/III	a-yes	no	YES	yes	studied	studied	GC	CG/GG	studied	CC	CC
female	36	<60	<60		<60	COPD	COPD	COPD nonsmokers						non smokers	non smokers	non smokers	non/ex-smokers				<65							<60				68	55.6			II	II	II/III		no			studied	studied	GC	CG/GG	studied	CC	CC
female	76	≥70	≥60		≥60	COPD	COPD	COPD ex-smokers	Patients	Bulgarian	1.72	65	30	ex-smokers	ex-smokers	ex/current sm	non/ex-smokers		19	≥4 median	≥65	a-yes	yes	AH			57	<60	≥50	≥40	>35	44	44.2	3.16	316	III	III/IV	II/III	a-yes	no	NO	yes	studied	studied	GC	CG/GG	studied	CC	CC
male	57	<60	<60		<60	controls	controls non-smokers	controls non-smokers						non smokers	non smokers	non smokers	non/ex-smokers				<65							<60				108	89.5							no			studied	studied	GC	CG/GG	studied	CC	CC
female	49	<60	<60		<60	controls	controls ex-smokers	controls ex-smokers	Controls	Bulgarian	1.59	62	20	ex-smokers	ex-smokers	ex/current sm	non/ex-smokers	no			<65			zdrav				<60												no	NO	no	studied	studied	GC	CG/GG	studied	CC	CC
female	48	<60	<60		<60	controls	controls currenmt smok	controls currenmt smok						current smokers	current smokers	ex/current sm	current smokers				<65							<60				94	74.9							no			studied	studied	GC	CG/GG	studied	CC	CC
female	41	<60	<60		<60	controls	controls currenmt smok	controls currenmt smok	Controls	Bulgarian	1.64	54	10	current smokers	current smokers	ex/current sm	current smokers				<65			zdrav				<60												no	NO	no	studied	studied	GC	CG/GG	studied	CC	CC
male	69	60-69	≥60	≥12	≥60	controls	controls non-smokers	controls non-smokers	Controls		1.8	75		non smokers	non smokers	non smokers	non/ex-smokers				≥65			zdrav				≥60												no			studied	studied	GC	CG/GG	studied	CC	CC
male	80	≥70	≥60		≥60	controls	controls non-smokers	controls non-smokers						non smokers	non smokers	non smokers	non/ex-smokers				≥65							≥60				86	85							no			studied	studied	GC	CG/GG	studied	CC	CC
male	79	≥70	≥60		≥60	controls	controls non-smokers	controls non-smokers						non smokers	non smokers	non smokers	non/ex-smokers				≥65							≥60				74	78.6							no			studied	studied	GC	CG/GG	studied	CC	CC
female	79	≥70	≥60		≥60	controls	controls non-smokers	controls non-smokers						non smokers	non smokers	non smokers	non/ex-smokers				≥65							≥60				104	78.7							no			studied	studied	GC	CG/GG	studied	CC	CC
female	75	≥70	≥60		≥60	controls	controls ex-smokers	controls ex-smokers						ex-smokers	ex-smokers	ex/current sm	non/ex-smokers				≥65							≥60				82	100							no			studied	studied	GC	CG/GG	studied	CC	CC
female	76	≥70	≥60		≥60	controls	controls ex-smokers	controls ex-smokers						ex-smokers	ex-smokers	ex/current sm	non/ex-smokers				≥65							≥60				113	100							no			studied	studied	GC	CG/GG	studied	CC	CC
female	70	≥70	≥60		≥60	controls	controls ex-smokers	controls ex-smokers						ex-smokers	ex-smokers	ex/current sm	non/ex-smokers				≥65							≥60				90	70.9							no			studied	studied	GC	CG/GG	studied	CC	CC
female	65	60-69	≥60		≥60	controls	controls currenmt smok	controls currenmt smok						current smokers	current smokers	ex/current sm	current smokers				≥65							≥60				79	85							no			studied	studied	GC	CG/GG	studied	CC	CC
female	47	<60	<60		<60	controls	controls currenmt smok	controls currenmt smok	Controls	Bulgarian	1.79	82	20	current smokers	current smokers	ex/current sm	current smokers	no			<65																			no		no	studied	studied	GC	CG/GG	studied	CC	CC
male	58	<60	<60		<60	controls	controls non-smokers	controls non-smokers	Controls	Bulgarian	1.7	76		non smokers	non smokers	non smokers	non/ex-smokers				<65			D	17	maninyl		<60												yes	YES	yes	studied	studied	GC	CG/GG	studied	CC	CC
male	62	60-69	≥60		≥60	controls	controls non-smokers	controls non-smokers	Controls	Bulgarian				non smokers	non smokers	non smokers	non/ex-smokers				<65			D		insulin		≥60												yes	YES	yes	studied	studied	GC	CG/GG	studied	CC	CC
female	61	60-69	≥60		≥60	controls	controls non-smokers	controls non-smokers	Controls	Bulgarian	1.58	69		non smokers	non smokers	non smokers	non/ex-smokers				<65			D/AH	4			≥60												yes	YES	yes	studied	studied	GC	CG/GG	studied	CC	CC
female	73	≥70	≥60		≥60	controls	controls non-smokers	controls non-smokers	Controls	Bulgarian	1.6	82		non smokers	non smokers	non smokers	non/ex-smokers				≥65			D		insulin		≥60												yes	YES	yes	studied	studied	GC	CG/GG	studied	CC	CC
female	67	60-69	≥60		≥60	controls	controls currenmt smok	controls currenmt smok						current smokers	current smokers	ex/current sm	current smokers				≥65							≥60				92	84.4							yes			studied	studied	GC	CG/GG	studied	CC	CC
male	59	<60	<60		<60	COPD			Patients	Bulgarian				ex-smokers					0	< 4 median	<65						59	<60	≥50	≥40	>35	55	67	2.01	201	II	II	II/III					studied	studied	GC	CG/GG	studied	CC	CC
female	73	≥70	≥60		≥60	COPD	COPD	COPD current smokers	Patients	Bulgarian	1.72	70	30	current smokers	current smokers	ex/current sm	current smokers	no	5	≥4 median	≥65						68	≥60	≥50	≥40	>35	55	66.3	4.09	409	II	II	II/III			NO	no	studied	studied	GC	CG/GG	studied	CC	CC
female	64	60-69	≥60		≥60	COPD	COPD	COPD current smokers	Patients	Bulgarian	1.65	84	40	current smokers	current smokers	ex/current sm	current smokers	no	3	< 4 median	<65						61	≥60	≥50	≥40	>35	49.3	46.9	2.46	246	III	III/IV	II/III					studied	studied	GC	CG/GG	studied	CC	CC
male	50	<60	<60		<60	controls			Controls	Bulgarian				non smokers							<65			zdrav				<60															studied	studied	GC	CG/GG	studied	CC	CC
male	49	<60	<60		<60	controls			Controls												<65							<60															studied	studied	GC	CG/GG	studied	CC	CC
male	51	<60	<60		<60	controls			Controls	Bulgarian											<65			NAP				<60															studied	studied	GC	CG/GG	studied	CC	CC
male	59	<60	<60		<60	controls			Controls												<65							<60															studied	studied	GC	CG/GG	studied	CC	CC
male	20	<60	<60		<60	controls			Controls												<65							<60															studied	studied	GC	CG/GG	studied	CC	CC
male	63	60-69	≥60		≥60	controls			Controls	Bulgarian											<65			NAP				≥60															studied	studied	GC	CG/GG	studied	CC	CC
male	63	60-69	≥60		≥60	controls			Controls	Bulgarian											<65			NAP				≥60															studied	studied	GC	CG/GG	studied	CC	CC
female	72	≥70	≥60		≥60	COPD	COPD	COPD nonsmokers						non smokers	non smokers	non smokers	non/ex-smokers				≥65							≥60				78	65.3			II	II	II/III		no			studied	studied	GG	CG/GG	studied	CC	CC
female	64	60-69	≥60		≥60	COPD	COPD	COPD nonsmokers	Patients	Bulgarian	1.52	47		non smokers	non smokers	non smokers	non/ex-smokers	no	0	< 4 median	<65						64	≥60	≥50	≥40	>35	40	68	1.2	120	III	III/IV	II/III	b-no	no	NO	no	studied	studied	GG	CG/GG	studied	CC	CC
female	65	60-69	≥60		≥60	controls	controls non-smokers	controls non-smokers						non smokers	non smokers	non smokers	non/ex-smokers				≥65							≥60				88	74.3							no			studied	studied	GG	CG/GG	studied	CC	CC
male	45	<60	<60		<60	controls			Controls	Bulgarian											<65							<60															studied	studied	GG	CG/GG	studied	CC	CC
male	58	<60	<60		<60	controls			Controls	Bulgarian											<65							<60															studied	studied	GG	CG/GG	studied	CC	CC
female	64	60-69	≥60		≥60	controls	controls non-smokers	controls non-smokers	Controls	Bulgarian	1.62	80		non smokers	non smokers	non smokers	non/ex-smokers				<65			pnevmonija				≥60															studied	studied	GG	CG/GG	studied	CC	CC
male	54	<60	<60		<60	controls	controls non-smokers	controls non-smokers	Controls	Bulgarian	1.7	72		non smokers	non smokers	non smokers	non/ex-smokers				<65			pneumonia		tavanic		<60														yes	studied	studied	CC	CC	studied	CT	CT/TT
male	56	<60	<60		<60	controls	controls non-smokers	controls non-smokers	Controls	other (Turkish)	1.7	79		non smokers	non smokers	non smokers	non/ex-smokers				<65			vibracionna bolest	0.25			<60														yes	studied	studied	CC	CC	studied	CT	CT/TT
female	55	<60	<60		<60	controls	controls non-smokers	controls non-smokers	Controls	other (Turkish)	1.6	65		non smokers	non smokers	non smokers	non/ex-smokers				<65			avtoiminen tiroidit	3			<60														yes	studied	studied	CC	CC	studied	CT	CT/TT
male	51	<60	<60		<60	controls			Controls												<65			NAP				<60															studied	studied	CC	CC	studied	CT	CT/TT
male	61	60-69	≥60		≥60	controls			Controls	Bulgarian				non smokers							<65			zdrav				≥60															studied	studied	CC	CC	studied	CT	CT/TT
male	62	60-69	≥60		≥60	controls			Controls	Bulgarian											<65			NAP				≥60															studied	studied	CC	CC	studied	CT	CT/TT
female	58	<60	<60		<60	COPD	COPD	COPD current smokers	Patients	Bulgarian	1.68	85	20	current smokers	current smokers	ex/current sm	current smokers		1	< 4 median	<65	a-yes	yes				57	<60	≥50	≥40	>35	69	66.3	3.01	301	II	II	II/III	a-yes	no	NO	no	studied	studied	GC	CG/GG	studied	CT	CT/TT
female	75	≥70	≥60		≥60	COPD	COPD	COPD nonsmokers	Patients	Bulgarian	1.55	65		non smokers	non smokers	non smokers	non/ex-smokers	yes	20	≥4 median	≥65			AH/HIBS/alergua drugs			55	<60	≥50	≥40	>35	78	67.8	1.55	155	II	II	II/III	b-no	no	YES	yes	studied	studied	GC	CG/GG	studied	CT	CT/TT
female	75	≥70	≥60		≥60	COPD	COPD	COPD ex-smokers	Patients	Bulgarian	1.7	53	30	ex-smokers	ex-smokers	ex/current sm	non/ex-smokers	no	3	< 4 median	≥65	a-yes	yes	HIBS/HSSN/HDihN			72	≥60	≥50	≥40	>35	52.4	70	3.13	313	II	II	II/III	a-yes	no	NO	yes	studied	studied	GC	CG/GG	studied	CT	CT/TT
female	67	60-69	≥60		≥60	COPD	COPD	COPD ex-smokers	Patients	Bulgarian			24	ex-smokers	ex-smokers	ex/current sm	non/ex-smokers	no	7	≥4 median	≥65						60	≥60	≥50	≥40	>35					II	II	II/III	a-yes	no	YES	yes	studied	studied	GC	CG/GG	studied	CT	CT/TT
female	84	≥70	≥60		≥60	COPD	COPD	COPD ex-smokers	Patients	Bulgarian	1.57	96	26	ex-smokers	ex-smokers	ex/current sm	non/ex-smokers	no	4	≥4 median	≥65			AH			80	≥60	≥50	≥40	>35	54	68	2.72	272	II	II	II/III	b-no	no	NO	yes	studied	studied	GC	CG/GG	studied	CT	CT/TT
male	75	≥70	≥60		≥60	COPD	COPD	COPD nonsmokers						non smokers	non smokers	non smokers	non/ex-smokers				≥65							≥60				58	77.3			II	II	II/III		no			studied	studied	GC	CG/GG	studied	CT	CT/TT
female	68	60-69	≥60		≥60	COPD	COPD	COPD nonsmokers	Patients	Bulgarian	1.65	53		non smokers	non smokers	non smokers	non/ex-smokers	no	13	≥4 median	≥65	a-yes	yes	osteoporoza			55	<60	≥50	≥40	>35	38	48	1.34	134	III	III/IV	II/III	a-yes	no	NO	yes	studied	studied	GC	CG/GG	studied	CT	CT/TT
female	58	<60	<60		<60	COPD	COPD	COPD current smokers	Patients	Bulgarian	1.5	75	30	current smokers	current smokers	ex/current sm	current smokers	no	1.2	< 4 median	<65			Kamerni ekstrasistoli			56.8	<60	≥50	≥40	>35	48.2	57	1.93	193	III	III/IV	II/III	b-no	no	NO	yes	studied	studied	GC	CG/GG	studied	CT	CT/TT
female	57	<60	<60		<60	COPD	COPD	COPD current smokers	Patients	Bulgarian	1.66	80	35	current smokers	current smokers	ex/current sm	current smokers	no	0.2	< 4 median	<65			AH/HSSN/			56.8	<60	≥50	≥40	>35	48	62	2.66	266	III	III/IV	II/III	b-no	no	NO	yes	studied	studied	GC	CG/GG	studied	CT	CT/TT
female	66	60-69	≥60		≥60	COPD	COPD	COPD ex-smokers	Patients	Bulgarian	1.72	83	70	ex-smokers	ex-smokers	ex/current sm	non/ex-smokers	no	1.5	< 4 median	≥65	a-yes	yes	HDihN/HSSN/AH			64.5	≥60	≥50	≥40	>35	49	67	2.71	271	III	III/IV	II/III	a-yes	no	NO	yes	studied	studied	GC	CG/GG	studied	CT	CT/TT
female	69	60-69	≥60		≥60	COPD	COPD	COPD current smokers	Patients	Bulgarian	1.73	66	50	current smokers	current smokers	ex/current sm	current smokers	no	0.2	< 4 median	≥65	a-yes	yes	AH/Stenokardija			68.8	≥60	≥50	≥40	>35	48.4	70	1.63	163	III	III/IV	II/III	a-yes	no	NO	yes	studied	studied	GC	CG/GG	studied	CT	CT/TT
female	76	≥70	≥60		≥60	COPD	COPD	COPD ex-smokers	Patients	Bulgarian	1.75	84	40	ex-smokers	ex-smokers	ex/current sm	non/ex-smokers	no	8	≥4 median	≥65	a-yes	yes	Tuberkul/AH/HSSN/HBN			68	≥60	≥50	≥40	>35	48	54.8	3.1	310	III	III/IV	II/III	a-yes	no	YES	yes	studied	studied	GC	CG/GG	studied	CT	CT/TT
female	76	≥70	≥60		≥60	COPD	COPD	COPD ex-smokers	Patients	Bulgarian	1.7	85	31	ex-smokers	ex-smokers	ex/current sm	non/ex-smokers	no	8	≥4 median	≥65	a-yes	yes	AH			68	≥60	≥50	≥40	>35	44	49.9	2.65	265	III	III/IV	II/III	a-yes	no	NO	yes	studied	studied	GC	CG/GG	studied	CT	CT/TT
female	73	≥70	≥60		≥60	COPD	COPD	COPD current smokers	Patients	Bulgarian	1.7	68	38	current smokers	current smokers	ex/current sm	current smokers	no	7	≥4 median	≥65	a-yes	yes				66	≥60	≥50	≥40	>35	48	38.7	2.73	273	III	III/IV	II/III	a-yes	no	NO	no	studied	studied	GC	CG/GG	studied	CT	CT/TT
male	72	≥70	≥60		≥60	COPD	COPD	COPD nonsmokers	Patients	Bulgarian	1.75	86		non smokers	non smokers	non smokers	non/ex-smokers		5	≥4 median	≥65			AH			67	≥60	≥50	≥40	>35	41	37.3	2.26	226	III	III/IV	II/III	b-no	no	NO	yes	studied	studied	GC	CG/GG	studied	CT	CT/TT
female	76	≥70	≥60		≥60	COPD	COPD	COPD ex-smokers	Patients	Bulgarian	1.65	65	60	ex-smokers	ex-smokers	ex/current sm	non/ex-smokers	no	4	≥4 median	≥65						72	≥60	≥50	≥40	>35	32	67	1.19	119	III	III/IV	II/III	b-no	no	NO	no	studied	studied	GC	CG/GG	studied	CT	CT/TT
female	56	<60	<60		<60	controls	controls non-smokers	controls non-smokers	Controls	Bulgarian	1.6	80		non smokers	non smokers	non smokers	non/ex-smokers				<65			Pneumonia	0.02	antibiotics		<60												no	YES	yes	studied	studied	GC	CG/GG	studied	CT	CT/TT
female	51	<60	<60	≥12	<60	controls	controls ex-smokers	controls ex-smokers	Controls	Bulgarian	1.83	73	25	ex-smokers	ex-smokers	ex/current sm	non/ex-smokers	no			<65			zdrav				<60												no		no	studied	studied	GC	CG/GG	studied	CT	CT/TT
female	55	<60	<60		<60	controls	controls ex-smokers	controls ex-smokers						ex-smokers	ex-smokers	ex/current sm	non/ex-smokers				<65							<60				92	75.5							no			studied	studied	GC	CG/GG	studied	CT	CT/TT
female	19	<60	<60		<60	controls	controls currenmt smok	controls currenmt smok						current smokers	current smokers	ex/current sm	current smokers				<65							<60				102	100							no			studied	studied	GC	CG/GG	studied	CT	CT/TT
female	45	<60	<60		<60	controls	controls currenmt smok	controls currenmt smok						current smokers	current smokers	ex/current sm	current smokers				<65							<60				108	78.3							no			studied	studied	GC	CG/GG	studied	CT	CT/TT
male	71	≥70	≥60	≥12	≥60									non smokers	non smokers	non smokers	non/ex-smokers				≥65							≥60				46	63							no			studied	studied	GC	CG/GG	studied	CT	CT/TT
male	80	≥70	≥60		≥60	controls	controls non-smokers	controls non-smokers						non smokers	non smokers	non smokers	non/ex-smokers				≥65							≥60				128	77.1							no			studied	studied	GC	CG/GG	studied	CT	CT/TT
female	72	≥70	≥60		≥60	controls	controls non-smokers	controls non-smokers						non smokers	non smokers	non smokers	non/ex-smokers				≥65							≥60				105	115							no			studied	studied	GC	CG/GG	studied	CT	CT/TT
female	73	≥70	≥60		≥60	controls	controls non-smokers	controls non-smokers						non smokers	non smokers	non smokers	non/ex-smokers				≥65							≥60				82	76.8							no			studied	studied	GC	CG/GG	studied	CT	CT/TT
female	69	60-69	≥60		≥60	controls	controls ex-smokers	controls ex-smokers						ex-smokers	ex-smokers	ex/current sm	non/ex-smokers				≥65							≥60				80	74.6							no			studied	studied	GC	CG/GG	studied	CT	CT/TT
female	66	60-69	≥60		≥60	controls	controls ex-smokers	controls ex-smokers						ex-smokers	ex-smokers	ex/current sm	non/ex-smokers				≥65							≥60				90	80.6							no			studied	studied	GC	CG/GG	studied	CT	CT/TT
female	67	60-69	≥60		≥60	controls	controls ex-smokers	controls ex-smokers						ex-smokers	ex-smokers	ex/current sm	non/ex-smokers				≥65							≥60				81	80							no			studied	studied	GC	CG/GG	studied	CT	CT/TT
female	74	≥70	≥60		≥60	controls	controls ex-smokers	controls ex-smokers						ex-smokers	ex-smokers	ex/current sm	non/ex-smokers				≥65							≥60				113	80.9							no			studied	studied	GC	CG/GG	studied	CT	CT/TT
female	52	<60	<60		<60	controls	controls ex-smokers	controls ex-smokers	Controls	Bulgarian	1.65	75	30	ex-smokers	ex-smokers	ex/current sm	non/ex-smokers	yes			<65																			no		no	studied	studied	GC	CG/GG	studied	CT	CT/TT
female	55	<60	<60		<60	controls	controls currenmt smok	controls currenmt smok	Controls	Bulgarian	1.72	78	30	current smokers	current smokers	ex/current sm	current smokers	no			<65																			no		no	studied	studied	GC	CG/GG	studied	CT	CT/TT
female	62	60-69	≥60		≥60	COPD	COPD	COPD ex-smokers	Patients	Bulgarian	1.75	110	45	ex-smokers	ex-smokers	ex/current sm	non/ex-smokers	no	1	< 4 median	<65	a-yes	yes	AH,D,hiperpl na prostata	10	diltiazem	52	<60	≥50	≥40	>35	50	63.18			II	II	II/III	a-yes	yes	YES	yes	studied	studied	GC	CG/GG	studied	CT	CT/TT
female	70	≥70	≥60		≥60	COPD	COPD	COPD ex-smokers	Patients	Bulgarian			17	ex-smokers	ex-smokers	ex/current sm	non/ex-smokers	no	0	< 4 median	≥65	a-yes	yes	D2, AH, MSB, hiperpl.na prost.	12	corinfor r	70	≥60	≥50	≥40			61.4			II	II	II/III	a-yes	yes	YES	yes	studied	studied	GC	CG/GG	studied	CT	CT/TT
female	78	≥70	≥60		≥60	COPD	COPD	COPD nonsmokers	Patients	Bulgarian	1.62	69		non smokers	non smokers	non smokers	non/ex-smokers	no	7	≥4 median	≥65	a-yes	yes	D/AH/MI			71	≥60	≥50	≥40	>35	36	59.5	1.93	193	III	III/IV	II/III	a-yes	yes	YES	yes	studied	studied	GC	CG/GG	studied	CT	CT/TT
female	72	≥70	≥60		≥60	COPD	COPD	COPD ex-smokers	Patients	Bulgarian	1.68	100	40	ex-smokers	ex-smokers	ex/current sm	non/ex-smokers	no	5	≥4 median	≥65	a-yes	yes	D/AH/HSSN/HIBS			67	≥60	≥50	≥40	>35	48	66	2.02	202	III	III/IV	II/III	a-yes	yes	YES	yes	studied	studied	GC	CG/GG	studied	CT	CT/TT
female	70	≥70	≥60		≥60	COPD	COPD	COPD current smokers	Patients	Bulgarian	1.74	90	40	current smokers	current smokers	ex/current sm	current smokers		0.3	< 4 median	≥65			D/AH/yazva			69.7	≥60	≥50	≥40	>35	37	64.5	2.6	260	III	III/IV	II/III	b-no	yes	YES	yes	studied	studied	GC	CG/GG	studied	CT	CT/TT
female	58	<60	<60		<60	controls	controls non-smokers	controls non-smokers	Controls	Bulgarian	1.62	74		non smokers	non smokers	non smokers	non/ex-smokers				<65			D		insulin		<60												yes	YES	yes	studied	studied	GC	CG/GG	studied	CT	CT/TT
female	42	<60	<60		<60	controls	controls non-smokers	controls non-smokers	Controls	Bulgarian	1.65	79		non smokers	non smokers	non smokers	non/ex-smokers				<65			D	10	insulin		<60												yes	YES	yes	studied	studied	GC	CG/GG	studied	CT	CT/TT
female	59	<60	<60	≥12	<60	controls	controls ex-smokers	controls ex-smokers	Controls		1.67	97	35	ex-smokers	ex-smokers	ex/current sm	non/ex-smokers				<65			AH/D				<60												yes			studied	studied	GC	CG/GG	studied	CT	CT/TT
female	42	<60	<60		<60	controls	controls currenmt smok	controls currenmt smok	Controls	Bulgarian	1.72	78	15	current smokers	current smokers	ex/current sm	current smokers				<65			D	3	amaryl		<60												yes	YES	yes	studied	studied	GC	CG/GG	studied	CT	CT/TT
female	67	60-69	≥60		≥60	controls	controls non-smokers	controls non-smokers	Controls	Bulgarian	1.6	59		non smokers	non smokers	non smokers	non/ex-smokers				≥65			D/AH	4	insulin		≥60												yes	YES	yes	studied	studied	GC	CG/GG	studied	CT	CT/TT
male	73	≥70	≥60		≥60	controls	controls non-smokers	controls non-smokers	Controls	Bulgarian	1.72	82		non smokers	non smokers	non smokers	non/ex-smokers				≥65			D/AH	13			≥60												yes	YES	yes	studied	studied	GC	CG/GG	studied	CT	CT/TT
male	77	≥70	≥60		≥60	controls	controls non-smokers	controls non-smokers	Controls	Bulgarian	1.72	79		non smokers	non smokers	non smokers	non/ex-smokers				≥65			D		insulin		≥60												yes	YES	yes	studied	studied	GC	CG/GG	studied	CT	CT/TT
female	75	≥70	≥60		≥60	controls	controls non-smokers	controls non-smokers	Controls	Bulgarian	1.62	76		non smokers	non smokers	non smokers	non/ex-smokers				≥65			D		insulin		≥60												yes	YES	yes	studied	studied	GC	CG/GG	studied	CT	CT/TT
female	73	≥70	≥60		≥60	controls	controls ex-smokers	controls ex-smokers						ex-smokers	ex-smokers	ex/current sm	non/ex-smokers				≥65							≥60				82	80							yes			studied	studied	GC	CG/GG	studied	CT	CT/TT
female	75	≥70	≥60		≥60	controls	controls ex-smokers	controls ex-smokers						ex-smokers	ex-smokers	ex/current sm	non/ex-smokers				≥65							≥60				110	72.3							yes			studied	studied	GC	CG/GG	studied	CT	CT/TT
female	75	≥70	≥60		≥60	controls	controls currenmt smok	controls currenmt smok						current smokers	current smokers	ex/current sm	current smokers				≥65							≥60				93	71.9							yes			studied	studied	GC	CG/GG	studied	CT	CT/TT
female	59	<60	<60		<60	COPD	COPD	COPD ex-smokers	Patients	Bulgarian	1.68	80	30	ex-smokers	ex-smokers	ex/current sm	non/ex-smokers	no	18	≥4 median	<65						41	<60	<50	≥40	>35	57	68	5.12	512	II	II	II/III					studied	studied	GC	CG/GG	studied	CT	CT/TT
female	59	<60	<60		<60	COPD	COPD	COPD ex-smokers	Patients	Bulgarian	1.67	89	40	ex-smokers	ex-smokers	ex/current sm	non/ex-smokers	no	12	≥4 median	<65						47	<60	<50	≥40	>35	66	69	3.57	357	II	II	II/III					studied	studied	GC	CG/GG	studied	CT	CT/TT
female	61	60-69	≥60		≥60	COPD	COPD	COPD current smokers	Patients	Bulgarian	1.83	85	20	current smokers	current smokers	ex/current sm	current smokers	no	2	< 4 median	<65						59	<60	≥50	≥40	>35	53	62.3	1.38	138	II	II	II/III					studied	studied	GC	CG/GG	studied	CT	CT/TT
female	56	<60	<60		<60	COPD	COPD	COPD nonsmokers	Patients	Bulgarian	1.54	44		non smokers	non smokers	non smokers	non/ex-smokers	no	5	≥4 median	<65						51	<60	≥50	≥40	>35	50	58.9	1.86	186	II	II	II/III					studied	studied	GC	CG/GG	studied	CT	CT/TT
female	72	≥70	≥60		≥60	COPD	COPD	COPD current smokers	Patients	Bulgarian	1.7	68	51	current smokers	current smokers	ex/current sm	current smokers		0.1	< 4 median	≥65	a-yes	yes				71.9	≥60	≥50	≥40	>35	55	70	3.46	346	II	II	II/III	a-yes		NO	no	studied	studied	GC	CG/GG	studied	CT	CT/TT
male	60	60-69	≥60		≥60	COPD	COPD	COPD nonsmokers	Patients	Bulgarian	1.7	74		non smokers	non smokers	non smokers	non/ex-smokers	no	0	< 4 median	<65						60	≥60	≥50	≥40	>35	56	68	2.03	203	II	II	II/III					studied	studied	GC	CG/GG	studied	CT	CT/TT
male	86	≥70	≥60		≥60	COPD	COPD	COPD nonsmokers	Patients	Bulgarian	1.64	83		non smokers	non smokers	non smokers	non/ex-smokers	no	1	< 4 median	≥65						85	≥60	≥50	≥40	>35	73	68.2	1.76	176	II	II	II/III					studied	studied	GC	CG/GG	studied	CT	CT/TT
female	84	≥70	≥60		≥60	COPD	COPD	COPD ex-smokers	Patients	Bulgarian	1.7	60	30	ex-smokers	ex-smokers	ex/current sm	non/ex-smokers	no	1	< 4 median	≥65						83	≥60	≥50	≥40	>35	64	65.1	1.32	132	II	II	II/III					studied	studied	GC	CG/GG	studied	CT	CT/TT
female	70	≥70	≥60		≥60	COPD	COPD	COPD ex-smokers	Patients	Bulgarian	1.68	106	60	ex-smokers	ex-smokers	ex/current sm	non/ex-smokers	no	1	< 4 median	≥65						69	≥60	≥50	≥40	>35	76	67.1	3.7	370	II	II	II/III					studied	studied	GC	CG/GG	studied	CT	CT/TT
female	77	≥70	≥60		≥60	COPD	COPD	COPD current smokers	Patients	Bulgarian	1.65	68	30	current smokers	current smokers	ex/current sm	current smokers	no	1	< 4 median	≥65						76	≥60	≥50	≥40	>35	78	68.6	4.86	486	II	II	II/III					studied	studied	GC	CG/GG	studied	CT	CT/TT
male	78	≥70	≥60		≥60	COPD			Patients	Bulgarian									1	< 4 median	≥65						77	≥60	≥50	≥40	>35	79	70	6.5	650	II	II	II/III					studied	studied	GC	CG/GG	studied	CT	CT/TT
female	45	<60	<60		<60	COPD	COPD	COPD ex-smokers	Patients	Bulgarian	1.8	95	23	ex-smokers	ex-smokers	ex/current sm	non/ex-smokers	yes	11	≥4 median	<65	a-yes	yes				34	<60	<50	<40	≤35	51	61	5.18	518	II	II	II/III	a-yes		NO	no	studied	studied	GC	CG/GG	studied	CT	CT/TT
female	77	≥70	≥60		≥60	COPD	COPD	COPD ex-smokers	Patients	Bulgarian	1.8	65	40	ex-smokers	ex-smokers	ex/current sm	non/ex-smokers		10	≥4 median	≥65						67	≥60	≥50	≥40	>35	15	60	1.01	101	IV	III/IV	IV					studied	studied	GC	CG/GG	studied	CT	CT/TT
male	44	<60	<60		<60	controls	controls non-smokers	controls non-smokers	Controls	Bulgarian	1.85	75		non smokers	non smokers	non smokers	non/ex-smokers	no			<65			zdrav				<60															studied	studied	GC	CG/GG	studied	CT	CT/TT
male	57	<60	<60		<60	controls	controls non-smokers	controls non-smokers	Controls	Bulgarian	1.82	80		non smokers	non smokers	non smokers	non/ex-smokers	no			<65			zdrav				<60															studied	studied	GC	CG/GG	studied	CT	CT/TT
female	55	<60	<60		<60	controls	controls non-smokers	controls non-smokers	Controls	Bulgarian	1.64	67		non smokers	non smokers	non smokers	non/ex-smokers	no			<65			zdrav				<60															studied	studied	GC	CG/GG	studied	CT	CT/TT
female	59	<60	<60		<60	controls	controls ex-smokers	controls ex-smokers	Controls	Bulgarian	1.76	82	20	ex-smokers	ex-smokers	ex/current sm	non/ex-smokers	no			<65			AH, tireotoksikoza, D,				<60															studied	studied	GC	CG/GG	studied	CT	CT/TT
female	47	<60	<60		<60	controls	controls currenmt smok	controls currenmt smok	Controls	Bulgarian	1.76	96	30	current smokers	current smokers	ex/current sm	current smokers				<65			vibracionna bolest,				<60															studied	studied	GC	CG/GG	studied	CT	CT/TT
female	53	<60	<60		<60	controls	controls currenmt smok	controls currenmt smok	Controls	Bulgarian	1.65	68	5	current smokers	current smokers	ex/current sm	current smokers	no			<65			zdrav				<60															studied	studied	GC	CG/GG	studied	CT	CT/TT
female	54	<60	<60		<60	controls	controls currenmt smok	controls currenmt smok	Controls	Bulgarian	1.65	70	10	current smokers	current smokers	ex/current sm	current smokers	no			<65			zdrav				<60															studied	studied	GC	CG/GG	studied	CT	CT/TT
female	57	<60	<60		<60	controls	controls currenmt smok	controls currenmt smok	Controls	Bulgarian	1.62	66	10	current smokers	current smokers	ex/current sm	current smokers	no			<65			zdrav				<60															studied	studied	GC	CG/GG	studied	CT	CT/TT
male	59	<60	<60		<60	controls			Controls	Bulgarian											<65							<60															studied	studied	GC	CG/GG	studied	CT	CT/TT
male	58	<60	<60		<60	controls			Controls	Bulgarian											<65							<60															studied	studied	GC	CG/GG	studied	CT	CT/TT
male	28	<60	<60		<60	controls			Controls	Bulgarian											<65							<60															studied	studied	GC	CG/GG	studied	CT	CT/TT
male	22	<60	<60		<60	controls			Controls												<65							<60															studied	studied	GC	CG/GG	studied	CT	CT/TT
male	20	<60	<60		<60	controls			Controls												<65							<60															studied	studied	GC	CG/GG	studied	CT	CT/TT
male	54	<60	<60		<60	controls			Controls	Bulgarian											<65			NAP				<60															studied	studied	GC	CG/GG	studied	CT	CT/TT
male	50	<60	<60		<60	controls			Controls												<65							<60															studied	studied	GC	CG/GG	studied	CT	CT/TT
male	56	<60	<60		<60	controls			Controls	Bulgarian											<65							<60															studied	studied	GC	CG/GG	studied	CT	CT/TT
male	52	<60	<60		<60	controls			Controls	Bulgarian											<65							<60															studied	studied	GC	CG/GG	studied	CT	CT/TT
male	47	<60	<60		<60	controls			Controls	Bulgarian											<65							<60															studied	studied	GC	CG/GG	studied	CT	CT/TT
male	40	<60	<60		<60	controls			Controls	Bulgarian											<65							<60															studied	studied	GC	CG/GG	studied	CT	CT/TT
male	54	<60	<60		<60	controls			Controls	Bulgarian											<65							<60															studied	studied	GC	CG/GG	studied	CT	CT/TT
male	40	<60	<60		<60	controls			Controls	Bulgarian											<65							<60															studied	studied	GC	CG/GG	studied	CT	CT/TT
male	43	<60	<60		<60	controls			Controls	Bulgarian											<65							<60															studied	studied	GC	CG/GG	studied	CT	CT/TT
male	52	<60	<60		<60	controls			Controls	Bulgarian											<65							<60															studied	studied	GC	CG/GG	studied	CT	CT/TT
male	30	<60	<60		<60	controls			Controls	Bulgarian											<65							<60															studied	studied	GC	CG/GG	studied	CT	CT/TT
male	22	<60	<60		<60	controls			Controls												<65							<60															studied	studied	GC	CG/GG	studied	CT	CT/TT
female	64	60-69	≥60		≥60	controls	controls currenmt smok	controls currenmt smok	Controls	Bulgarian	1.56	60	15	current smokers	current smokers	ex/current sm	current smokers	no			<65			zdrav				≥60															studied	studied	GC	CG/GG	studied	CT	CT/TT
male	61	60-69	≥60		≥60	controls			Controls	Bulgarian											<65			NAP				≥60															studied	studied	GC	CG/GG	studied	CT	CT/TT
male	62	60-69	≥60		≥60	controls			Controls	Bulgarian											<65			NAP				≥60															studied	studied	GC	CG/GG	studied	CT	CT/TT
male	65	60-69	≥60		≥60	controls	controls non-smokers	controls non-smokers	Controls	Bulgarian	1.72	82		non smokers	non smokers	non smokers	non/ex-smokers	no			≥65			pnevmonija, hronichen bronhit				≥60															studied	studied	GC	CG/GG	studied	CT	CT/TT
male	65	60-69	≥60		≥60	controls			Controls	Bulgarian											≥65							≥60															studied	studied	GC	CG/GG	studied	CT	CT/TT
male	72	≥70	≥60		≥60	controls			Controls												≥65							≥60															studied	studied	GC	CG/GG	studied	CT	CT/TT
male	86	≥70	≥60		≥60	controls			Controls												≥65							≥60															studied	studied	GC	CG/GG	studied	CT	CT/TT
male	71	≥70	≥60		≥60	controls			Controls	Bulgarian											≥65							≥60															studied	studied	GC	CG/GG	studied	CT	CT/TT
female	60	60-69	≥60		≥60	COPD	COPD	COPD current smokers	Patients	Bulgarian	1.7	79	28	current smokers	current smokers	ex/current sm	current smokers	yes	1	< 4 median	<65	a-yes	yes	AH/IBS			59	<60	≥50	≥40	>35	59	69	3.06	306	II	II	II/III	a-yes	no	NO	yes	studied	studied	GG	CG/GG	studied	CT	CT/TT
female	65	60-69	≥60		≥60	COPD	COPD	COPD ex-smokers	Patients	Bulgarian	1.75	83	45	ex-smokers	ex-smokers	ex/current sm	non/ex-smokers	no	0.08	< 4 median	≥65			HIBS/HSSN/AH			64.92	≥60	≥50	≥40	>35	79	69	4.23	423	II	II	II/III	b-no	no	NO	yes	studied	studied	GG	CG/GG	studied	CT	CT/TT
female	57	<60	<60		<60	COPD	COPD	COPD nonsmokers	Patients	Bulgarian	1.6	75		non smokers	non smokers	non smokers	non/ex-smokers	no	0.1	< 4 median	<65	a-yes	yes				56.9	<60	≥50	≥40	>35	34	58	1.74	174	III	III/IV	II/III	a-yes	no	NO	no	studied	studied	GG	CG/GG	studied	CT	CT/TT
female	78	≥70	≥60		≥60	COPD	COPD	COPD nonsmokers	Patients	Bulgarian	1.66	75		non smokers	non smokers	non smokers	non/ex-smokers	no	0.3	< 4 median	≥65	a-yes	yes	HIBS/HSSN/Pulmofibroza			77.7	≥60	≥50	≥40	>35	42	68	1.65	165	III	III/IV	II/III	a-yes	no	YES	yes	studied	studied	GG	CG/GG	studied	CT	CT/TT
female	55	<60	<60		<60	COPD	COPD	COPD ex-smokers	Patients	Bulgarian			29	ex-smokers	ex-smokers	ex/current sm	non/ex-smokers				<65							<60								III	III/IV	II/III	b-no	no	NO		studied	studied	GG	CG/GG	studied	CT	CT/TT
female	47	<60	<60		<60	controls	controls currenmt smok	controls currenmt smok						current smokers	current smokers	ex/current sm	current smokers				<65							<60				103	78.8							no			studied	studied	GG	CG/GG	studied	CT	CT/TT
male	70	≥70	≥60		≥60	controls	controls non-smokers	controls non-smokers						non smokers	non smokers	non smokers	non/ex-smokers				≥65							≥60				98	70							no			studied	studied	GG	CG/GG	studied	CT	CT/TT
male	21	<60	<60		<60	controls			Controls												<65							<60															studied	studied	GG	CG/GG	studied	CT	CT/TT
male	59	<60	<60		<60	controls			Controls	Bulgarian											<65			NAP				<60															studied	studied	GG	CG/GG	studied	CT	CT/TT
male	35	<60	<60		<60	controls			Controls	Bulgarian											<65							<60															studied	studied	GG	CG/GG	studied	CT	CT/TT
male	33	<60	<60		<60	controls			Controls	Bulgarian											<65							<60															studied	studied	GG	CG/GG	studied	CT	CT/TT
male	21	<60	<60		<60	controls			Controls												<65							<60															studied	studied	GG	CG/GG	studied	CT	CT/TT
female	69	60-69	≥60		≥60	controls	controls non-smokers	controls non-smokers						non smokers	non smokers	non smokers	non/ex-smokers				≥65							≥60				111	75.2							no			studied	studied			studied	CT	CT/TT
male	73	≥70	≥60		≥60	controls	controls non-smokers	controls non-smokers	Controls	Bulgarian	1.72	80		non smokers	non smokers	non smokers	non/ex-smokers				≥65			D	50	insulin		≥60												yes	YES	yes	studied	studied	CC	CC	studied	TT	CT/TT
female	75	≥70	≥60		≥60	COPD	COPD	COPD current smokers	Patients	Bulgarian	1.75	86	50	current smokers	current smokers	ex/current sm	current smokers	no	0	< 4 median	≥65			AH/HIBS/HSSN			75	≥60	≥50	≥40	>35	74	61	2.83	283	II	II	II/III	b-no	no	NO	yes	studied	studied	GG	CG/GG	studied	TT	CT/TT
female	59	<60	<60		<60	COPD	COPD	COPD ex-smokers	Patients	Bulgarian	1.57	96	20	ex-smokers	ex-smokers	ex/current sm	non/ex-smokers	no	0	< 4 median	<65	a-yes	yes				59	<60	≥50	≥40	>35	41	58.4	2.8	280	III	III/IV	II/III	a-yes	no	NO	no	studied	studied	GG	CG/GG	studied	TT	CT/TT
female	66	60-69	≥60		≥60	COPD	COPD	COPD ex-smokers	Patients	Bulgarian	1.67	77	40	ex-smokers	ex-smokers	ex/current sm	non/ex-smokers	no	0.2	< 4 median	≥65	a-yes	yes	HDihN/AH/HSSN/Insult,			65.8	≥60	≥50	≥40	>35	37	69	3.25	325	III	III/IV	II/III	a-yes	no	YES	yes	studied	studied	GG	CG/GG	studied	TT	CT/TT
female	74	≥70	≥60		≥60	COPD	COPD	COPD ex-smokers	Patients	Bulgarian	1.6	55	40	ex-smokers	ex-smokers	ex/current sm	non/ex-smokers	no	2	< 4 median	≥65	a-yes	yes				72	≥60	≥50	≥40	>35	47	56	1.02	102	III	III/IV	II/III	a-yes	no	NO	no	studied	studied	GG	CG/GG	studied	TT	CT/TT
female	79	≥70	≥60		≥60	controls	controls non-smokers	controls non-smokers	Controls	Bulgarian	1.68	62		non smokers	non smokers	non smokers	non/ex-smokers				≥65			pneumonia/insult				≥60												no	YES	yes	studied	studied	GG	CG/GG	studied	TT	CT/TT
male	55	<60	<60		<60	controls	controls non-smokers	controls non-smokers	Controls	Bulgarian	1.72	82		non smokers	non smokers	non smokers	non/ex-smokers				<65			D	8	insulin		<60												yes	YES	yes	studied	studied	GG	CG/GG	studied	TT	CT/TT
female	62	60-69	≥60		≥60	controls	controls non-smokers	controls non-smokers	Controls	Bulgarian	1.68	65		non smokers	non smokers	non smokers	non/ex-smokers				<65			D	22	insulin		≥60												yes	YES	yes	studied	studied	GG	CG/GG	studied	TT	CT/TT
female	61	60-69	≥60		≥60	controls	controls ex-smokers	controls ex-smokers	Controls	Bulgarian	1.75	68	10	ex-smokers	ex-smokers	ex/current sm	non/ex-smokers				<65			D	4	maminyl		≥60												yes	YES	yes	studied	studied	GG	CG/GG	studied	TT	CT/TT
female	70	≥70	≥60		≥60	COPD	COPD	COPD ex-smokers	Patients	Bulgarian	1.8	81	14	ex-smokers	ex-smokers	ex/current sm	non/ex-smokers		14	≥4 median	≥65	a-yes	yes	AH/HSSN			56	<60	≥50	≥40	>35	40	50.2	3.25	325	III	III/IV	II/III	a-yes	no	NO	yes	studied	non			studied	CC	CC
male	60	60-69	≥60		≥60	controls	controls non-smokers	controls non-smokers	Controls	Bulgarian	1.75	75		non smokers	non smokers	non smokers	non/ex-smokers	no			<65																			no		no	studied	non			studied	CC	CC
female	62	60-69	≥60		≥60	COPD	COPD	COPD ex-smokers	Patients	Bulgarian	1.76	89	15	ex-smokers	ex-smokers	ex/current sm	non/ex-smokers	no	7	≥4 median	<65	a-yes	yes	AH, MSB	10	kav.ton, lis	52	<60	≥50	≥40	>35	65	56.2			II	II	II/III	a-yes	yes	YES	yes	studied	non			studied	CC	CC
female	52	<60	<60		<60	COPD	COPD	COPD ex-smokers	Patients	Bulgarian	1.82	119	20	ex-smokers	ex-smokers	ex/current sm	non/ex-smokers	no	1	< 4 median	<65						51	<60	≥50	≥40	>35	64	62.4	4.9	490	II	II	II/III					studied	studied			studied	CC	CC
female	65	60-69	≥60		≥60	COPD	COPD	COPD ex-smokers	Patients	Bulgarian	1.86	103	26	ex-smokers	ex-smokers	ex/current sm	non/ex-smokers	no	10	≥4 median	≥65	a-yes	yes				55	<60	≥50	≥40	>35	45	51.6	4.5	450	III	III/IV	II/III	a-yes		NO	no	studied	studied			studied	CC	CC
male	47	<60	<60		<60	controls			Controls	Bulgarian											<65			zdrav				<60															studied	studied			studied	CC	CC
male	52	<60	<60		<60	controls			Controls	Bulgarian											<65							<60															studied	studied			studied	CC	CC
male	27	<60	<60		<60	controls			Controls												<65							<60															studied	studied			studied	CC	CC
male	24	<60	<60		<60	controls			Controls												<65							<60															studied	studied			studied	CC	CC
male	21	<60	<60		<60	controls			Controls												<65							<60															studied	studied			studied	CC	CC
female	60	60-69	≥60		≥60	COPD	COPD	COPD ex-smokers	Patients	Bulgarian	1.87	104	13	ex-smokers	ex-smokers	ex/current sm	non/ex-smokers		2.5	< 4 median	<65	a-yes	yes	AH			57.5	<60	≥50	≥40	>35	38	57.2	2.75	275	III	III/IV	II/III	a-yes	no	NO	yes	studied	studied			studied	CT	CT/TT
female	67	60-69	≥60		≥60	COPD	COPD	COPD ex-smokers	Patients	Bulgarian	1.62	84	24	ex-smokers	ex-smokers	ex/current sm	non/ex-smokers	yes	7	≥4 median	≥65	a-yes	yes	AH			60	≥60	≥50	≥40	>35	36	50.4	2.55	255	III	III/IV	II/III	a-yes	no	NO	yes	studied	studied			studied	CT	CT/TT
male	66	60-69	≥60		≥60	controls	controls non-smokers	controls non-smokers						non smokers	non smokers	non smokers	non/ex-smokers				≥65							≥60				93	76.6							no			studied	studied			studied	CT	CT/TT
male	76	≥70	≥60		≥60	controls	controls non-smokers	controls non-smokers						non smokers	non smokers	non smokers	non/ex-smokers				≥65							≥60				111	84.1							no			studied	studied			studied	CT	CT/TT
female	77	≥70	≥60		≥60	controls	controls non-smokers	controls non-smokers						non smokers	non smokers	non smokers	non/ex-smokers				≥65							≥60				95	71.9							no			studied	studied			studied	CT	CT/TT
female	75	≥70	≥60	≥12	≥60									ex-smokers	ex-smokers	ex/current sm	non/ex-smokers				≥65							≥60				52	78.7							no			studied	studied			studied	CT	CT/TT
female	76	≥70	≥60		≥60	controls	controls currenmt smok	controls currenmt smok						current smokers	current smokers	ex/current sm	current smokers				≥65							≥60				95	78.5							no			studied	studied			studied	CT	CT/TT
male	72	≥70	≥60		≥60	controls	controls non-smokers	controls non-smokers						non smokers	non smokers	non smokers	non/ex-smokers				≥65							≥60				94	76.4							yes			studied	studied			studied	CT	CT/TT
female	76	≥70	≥60		≥60	controls	controls non-smokers	controls non-smokers	Controls	Bulgarian	1.58	64		non smokers	non smokers	non smokers	non/ex-smokers				≥65			D	8	insulin		≥60												yes	YES	yes	studied	studied			studied	CT	CT/TT
female	41	<60	<60		<60	controls	controls non-smokers	controls non-smokers	Controls	Bulgarian	1.65	52		non smokers	non smokers	non smokers	non/ex-smokers				<65			pneumonia	0.02	antibiotics		<60														yes	studied	studied			studied	CT	CT/TT
male	26	<60	<60		<60	controls			Controls												<65							<60															studied	studied			studied	CT	CT/TT
male	20	<60	<60		<60	controls			Controls												<65							<60															studied	studied			studied	CT	CT/TT
male	58	<60	<60		<60	controls			Controls	Bulgarian											<65							<60															studied	studied			studied	CT	CT/TT
male	21	<60	<60		<60	controls			Controls												<65							<60															studied	studied			studied	CT	CT/TT
female	76	≥70	≥60		≥60	COPD	COPD	COPD current smokers						current smokers	current smokers	ex/current sm	current smokers				≥65							≥60				61	36.6			II	II	II/III		no			studied	studied	GC	CG/GG	non
female	78	≥70	≥60		≥60	controls	controls currenmt smok	controls currenmt smok						current smokers	current smokers	ex/current sm	current smokers				≥65							≥60				77	76							no			studied	studied	GC	CG/GG	non
female	60	60-69	≥60		≥60	COPD	COPD	COPD current smokers						current smokers	current smokers	ex/current sm	current smokers				≥65							≥60				79	53			II	II	II/III		yes			studied	studied	GC	CG/GG	non
male	55	<60	<60	≥12	<60	controls	controls non-smokers	controls non-smokers	Controls		1.67	90		non smokers	non smokers	non smokers	non/ex-smokers				<65			AH				<60												no			studied	studied			non
male	77	≥70	≥60		≥60	controls	controls non-smokers	controls non-smokers						non smokers	non smokers	non smokers	non/ex-smokers				≥65							≥60				89	73.2							no			studied	studied			non
female	71	≥70	≥60		≥60	controls	controls ex-smokers	controls ex-smokers						ex-smokers	ex-smokers	ex/current sm	non/ex-smokers				≥65							≥60				107	85.8							no			studied	studied			non
male	23	<60	<60		<60	controls			Controls												<65							<60															studied	studied			non
male	26	<60	<60		<60	controls			Controls												<65							<60															studied	studied			non
male	25	<60	<60		<60	controls			Controls												<65							<60															studied	studied			non
male	24	<60	<60		<60	controls			Controls												<65							<60															studied	studied			non
male	21	<60	<60		<60	controls			Controls												<65							<60															studied	studied			non
male	21	<60	<60		<60	controls			Controls												<65							<60															studied	studied			non
male	21	<60	<60		<60	controls			Controls												<65							<60															studied	studied			non
male	21	<60	<60		<60	controls			Controls												<65							<60															studied	studied			non
male	19	<60	<60		<60	controls			Controls												<65							<60															studied	studied			non
male	20	<60	<60		<60	controls			Controls												<65							<60															studied	studied			non
male	27	<60	<60		<60	controls			Controls												<65							<60															studied	studied			non
male	20	<60	<60		<60	controls			Controls												<65							<60															studied	studied			non
female	68	60-69	≥60		≥60	COPD	COPD	COPD current smokers	Patients	Bulgarian	1.68	85	21	current smokers	current smokers	ex/current sm	current smokers	no	7	≥4 median	≥65						61	≥60	≥50	≥40	>35	51	66.3	3.61	361	II	II	II/III	b-no	no	NO	no	non	non			non
female	66	60-69	≥60		≥60	COPD	COPD	COPD ex-smokers	Patients	Bulgarian	1.75	80	20	ex-smokers	ex-smokers	ex/current sm	non/ex-smokers	no	10	≥4 median	≥65	a-yes	yes				56	<60	≥50	≥40	>35	49	59.7	3.9	390	III	III/IV	II/III	a-yes	no	NO		non	non			non
female	62	60-69	≥60		≥60	COPD	COPD	COPD ex-smokers	Patients	Bulgarian	1.75	72		ex-smokers	ex-smokers	ex/current sm	non/ex-smokers	no	1	< 4 median	<65	a-yes	yes	HB			61	≥60	≥50	≥40	>35	34	45	1.2	120	III	III/IV	II/III	a-yes	no	NO	yes	non	non			non
female	77	≥70	≥60		≥60	COPD	COPD	COPD ex-smokers	Patients	Bulgarian	1.6	85	15	ex-smokers	ex-smokers	ex/current sm	non/ex-smokers	no	15	≥4 median	≥65	a-yes	yes	AH			62	≥60	≥50	≥40	>35	46	63.7	0.98	98	III	III/IV	II/III	a-yes	no	NO	yes	non	non			non
male	73	≥70	≥60		≥60	COPD	COPD	COPD nonsmokers	Patients	Bulgarian	1.7	72		non smokers	non smokers	non smokers	non/ex-smokers	no	6	≥4 median	≥65			AH			67	≥60	≥50	≥40	>35	43	67.1	2.19	219	III	III/IV	II/III	b-no	no	NO	yes	non	non			non
male	10	<60	<60	<12	<60	AsthmaChildren			Patients	Bulgarian				non smokers	non smokers	non smokers	non/ex-smokers	yes	3	< 4 median	<65					Ventolin	8	<60	<50	<40	≤35									no			non	non			non
male	10	<60	<60	<12	<60	AsthmaChildren			Patients	Bulgarian				non smokers	non smokers	non smokers	non/ex-smokers	no	0	< 4 median	<65	yes		pneumonia		Aksetin	10	<60	<50	<40	≤35									no	yes	yes	non	non			non
male	7	<60	<60	<12	<60	AsthmaChildren			Patients	Bulgarian				non smokers	non smokers	non smokers	non/ex-smokers	no	0	< 4 median	<65	yes		pneumonia		Cefazolin	7	<60	<50	<40	≤35									no	yes	yes	non	non			non
male	10	<60	<60	<12	<60	AsthmaChildren			Patients	Bulgarian				non smokers	non smokers	non smokers	non/ex-smokers	yes	2	< 4 median	<65	yes		pneumonia		Aksetin, Ven	8	<60	<50	<40	≤35									no	yes	yes	non	non			non
male	8	<60	<60	<12	<60	AsthmaChildren			Patients	Bulgarian				non smokers	non smokers	non smokers	non/ex-smokers	yes	3	< 4 median	<65	yes				Ventolin	5	<60	<50	<40	≤35									no			non	non			non
male	8	<60	<60	<12	<60	AsthmaChildren			Patients	Bulgarian				non smokers	non smokers	non smokers	non/ex-smokers	no	0	< 4 median	<65			pneumonia			8	<60	<50	<40	≤35									no	yes	yes	non	non			non
male	9	<60	<60	<12	<60	AsthmaChildren			Patients	Bulgarian				non smokers	non smokers	non smokers	non/ex-smokers		0	< 4 median	<65	yes		pneumonia		Medaxon	9	<60	<50	<40	≤35									no	yes	yes	non	non			non
male	16	<60	<60	≥12	<60	AsthmaChildren			Patients	Bulgarian				non smokers	non smokers	non smokers	non/ex-smokers	yes	3	< 4 median	<65	yes				Ventolin	13	<60	<50	<40	≤35									no			non	non			non
male	17	<60	<60	≥12	<60	AsthmaChildren			Patients	Bulgarian				non smokers	non smokers	non smokers	non/ex-smokers	no	3	< 4 median	<65	yes		pneumonia		Ciprinol	14	<60	<50	<40	≤35									no	yes	yes	non	non			non
male	9	<60	<60	<12	<60	AsthmaChildren			Patients	Bulgarian								yes	3	< 4 median	<65	yes		pneumonia			6	<60	<50	<40	≤35									no	yes		non	non			non
male	15	<60	<60	≥12	<60	AsthmaChildren			Patients	Bulgarian								yes	2	< 4 median	<65	yes				Ekozal,Efira	13	<60	<50	<40	≤35									no			non	non			non
male	13	<60	<60	≥12	<60	AsthmaChildren			Patients	Bulgarian								yes	3	< 4 median	<65	yes		pneumonia		Ventolin	10	<60	<50	<40	≤35									no	yes	yes	non	non			non
male	6	<60	<60	<12	<60	AsthmaChildren			Patients	Bulgarian	1.2	30		non smokers	non smokers	non smokers	non/ex-smokers	yes	4	≥4 median	<65	yes				Aksetin	2	<60	<50	<40	≤35	76	109							no			non	non			non
male	9	<60	<60	<12	<60	AsthmaChildren			Patients	Bulgarian				non smokers	non smokers	non smokers	non/ex-smokers	yes	6	≥4 median	<65	yes				Ventolin	3	<60	<50	<40	≤35									no			non	non			non
male	7	<60	<60	<12	<60	AsthmaChildren			Patients	Bulgarian				non smokers	non smokers	non smokers	non/ex-smokers	yes	6	≥4 median	<65	yes		pneumonia		Cefazolin	1	<60	<50	<40	≤35									no		yes	non	non			non
male	8	<60	<60	<12	<60	AsthmaChildren			Patients	Bulgarian				non smokers	non smokers	non smokers	non/ex-smokers	yes	5	≥4 median	<65	yes		pneumonia		Tobramicin	3	<60	<50	<40	≤35									no	yes	yes	non	non			non
male	14	<60	<60	≥12	<60	AsthmaChildren			Patients	Bulgarian	1.55	55		non smokers	non smokers	non smokers	non/ex-smokers	yes	6	≥4 median	<65	yes				Ventolin	8	<60	<50	<40	≤35	67	114							no			non	non			non
male	16	<60	<60	≥12	<60	AsthmaChildren			Patients	Bulgarian				non smokers	non smokers	non smokers	non/ex-smokers	yes	10	≥4 median	<65	yes				Ventolin	6	<60	<50	<40	≤35									no			non	non			non
male	12	<60	<60	≥12	<60	AsthmaChildren			Patients	Bulgarian				non smokers	non smokers	non smokers	non/ex-smokers	no	6	≥4 median	<65	yes				Aksetin,Vent	6	<60	<50	<40	≤35									no			non	non			non
male	12	<60	<60	≥12	<60	AsthmaChildren			Patients	Bulgarian				non smokers	non smokers	non smokers	non/ex-smokers	yes	5	≥4 median	<65			pneumonia		Ciprinol	7	<60	<50	<40	≤35									no	yes	yes	non	non			non
male	15	<60	<60	≥12	<60	AsthmaChildren			Patients	Bulgarian								yes	9	≥4 median	<65	yes		pneumonia		Ventolin	6	<60	<50	<40	≤35									no	yes	yes	non	non			non
male	8	<60	<60	<12	<60	AsthmaChildren			Patients	Bulgarian	1.44	50		non smokers	non smokers	non smokers	non/ex-smokers	no			<65	yes		obesity,pneumonia		Medakson	9	<60	<50	<40	≤35									no	yes	yes	non	non			non
male	6	<60	<60	<12	<60	AsthmaChildren			Patients	Bulgarian				non smokers	non smokers	non smokers	non/ex-smokers	yes			<65	yes		pneumonia		Medaxon	6	<60	<50	<40	≤35									no	yes	yes	non	non			non
male	8	<60	<60	<12	<60	AsthmaChildren			Patients	Bulgarian				non smokers	non smokers	non smokers	non/ex-smokers	no			<65	yes		pneumonia,hypitireoidisum	8	Aksetin,Vent		<60			≤35									no	yes	yes	non	non			non
male	36	<60	<60	≥12	<60									non smokers	non smokers	non smokers	non/ex-smokers				<65							<60				74	78.6							no			non	non			non
female	43	<60	<60		<60	controls	controls currenmt smok	controls currenmt smok	Controls	Bulgarian	1.78	60	22	current smokers	current smokers	ex/current sm	current smokers	no			<65			hr. bronhit				<60												no	NO	yes	non	non			non
female	30	<60	<60		<60	controls	controls currenmt smok	controls currenmt smok	Controls	other (Turkish)	1.81	110	15	current smokers	current smokers	ex/current sm	current smokers				<65							<60												no	NO	no	non	non			non
male	74	≥70	≥60	≥12	≥60									non smokers	non smokers	non smokers	non/ex-smokers				≥65							≥60				48	83							no			non	non			non
male	80	≥70	≥60	≥12	≥60									non smokers	non smokers	non smokers	non/ex-smokers				≥65							≥60				89	86							no			non	non			non
male	68	60-69	≥60		≥60	controls	controls non-smokers	controls non-smokers						non smokers	non smokers	non smokers	non/ex-smokers				≥65							≥60				99	93.8							no			non	non			non
female	68	60-69	≥60	≥12	≥60									ex-smokers	ex-smokers	ex/current sm	non/ex-smokers				≥65							≥60				70	72.5							no			non	non			non
female	78	≥70	≥60	≥12	≥60									ex-smokers	ex-smokers	ex/current sm	non/ex-smokers				≥65							≥60				39	77.8							no			non	non			non
female	47	<60	<60		<60	controls	controls currenmt smok	controls currenmt smok	Controls	Bulgarian	1.75	70	20	current smokers	current smokers	ex/current sm	current smokers	no			<65																			no		no	non	non			non
female	62	60-69	≥60		≥60	COPD	COPD	COPD ex-smokers	Patients	Bulgarian	1.6	92	22	ex-smokers	ex-smokers	ex/current sm	non/ex-smokers	no	8	≥4 median	<65			D			54	<60	≥50	≥40	>35	62	49.2	3.63	363	II	II	II/III	b-no	yes	YES	yes	non	non			non
male	40	<60	<60		<60	Basthma			Patients	Bulgarian	1.63	57		non smokers	non smokers	non smokers	non/ex-smokers		1	< 4 median	<65						39	<60	<50	<40	>35												non	non			non
female	38	<60	<60		<60	Basthma			Patients	Bulgarian	1.76	95	3	ex-smokers	ex-smokers	ex/current sm	non/ex-smokers		2.5	< 4 median	<65						35.5	<60	<50	<40	>35		77.7										non	non			non
female	39	<60	<60		<60	Basthma			Patients	Bulgarian	1.67	53	10	ex-smokers	ex-smokers	ex/current sm	non/ex-smokers	no	0	< 4 median	<65						39	<60	<50	<40	>35												non	non			non
male	58	<60	<60		<60	Basthma			Patients	Bulgarian	1.75	79		non smokers	non smokers	non smokers	non/ex-smokers	no	19	≥4 median	<65			emfizem, pulmofibroza			39	<60	<50	<40	>35	76	55.8										non	non			non
male	56	<60	<60		<60	Basthma			Patients	Bulgarian	1.84	105		non smokers	non smokers	non smokers	non/ex-smokers	no	20	≥4 median	<65			HDN, AH, bronhit			36	<60	<50	<40	>35	79	90	6.53	653								non	non			non
male	49	<60	<60		<60	Basthma			Patients	Bulgarian	1.56	58		non smokers	non smokers	non smokers	non/ex-smokers		12	≥4 median	<65						37	<60	<50	<40	>35												non	non			non
male	44	<60	<60		<60	Basthma			Patients	Bulgarian	1.82	74		non smokers	non smokers	non smokers	non/ex-smokers		4.5	≥4 median	<65						39.5	<60	<50	<40	>35		66.2										non	non			non
male	63	60-69	≥60		≥60	Basthma			Patients	Bulgarian	1.64	86		non smokers	non smokers	non smokers	non/ex-smokers		24	≥4 median	<65			BTE	9		39	<60	<50	<40	>35											yes	non	non			non
male	47	<60	<60		<60	Basthma			Patients	Bulgarian	1.86	70		non smokers	non smokers	non smokers	non/ex-smokers		2	< 4 median	<65						45	<60	<50	≥40	>35												non	non			non
male	53	<60	<60		<60	Basthma			Patients	Bulgarian	1.7	94		non smokers	non smokers	non smokers	non/ex-smokers		3	< 4 median	<65			pnevmonija			50	<60	<50	≥40	>35												non	non			non
male	58	<60	<60		<60	Basthma			Patients	Bulgarian	1.65	60		non smokers	non smokers	non smokers	non/ex-smokers		10	≥4 median	<65						48	<60	<50	≥40	>35												non	non			non
male	53	<60	<60		<60	Basthma			Patients	Bulgarian	1.7	62		non smokers	non smokers	non smokers	non/ex-smokers		6	≥4 median	<65						47	<60	<50	≥40	>35												non	non			non
male	56	<60	<60		<60	Basthma			Patients	Bulgarian	1.55	100		non smokers	non smokers	non smokers	non/ex-smokers	no	13	≥4 median	<65			obizitos, histerektomija-mioma			43	<60	<50	≥40	>35		99	3.3	330								non	non			non
male	54	<60	<60		<60	Basthma			Patients	Bulgarian	1.6	88		non smokers	non smokers	non smokers	non/ex-smokers		5	≥4 median	<65			AH			49	<60	<50	≥40	>35											yes	non	non			non
male	62	60-69	≥60		≥60	Basthma			Patients	Bulgarian	1.67	62		non smokers	non smokers	non smokers	non/ex-smokers		14	≥4 median	<65						48	<60	<50	≥40	>35												non	non			non
female	58	<60	<60		<60	Basthma			Patients	Bulgarian	1.74	70	5	ex-smokers	ex-smokers	ex/current sm	non/ex-smokers		10	≥4 median	<65						48	<60	<50	≥40	>35		75										non	non			non
female	61	60-69	≥60		≥60	Basthma			Patients	Bulgarian	1.72	81	40	ex-smokers	ex-smokers	ex/current sm	non/ex-smokers	no	16	≥4 median	<65			Hipetonichna bolest, NAP			45	<60	<50	≥40	>35	60	57	2.51	251								non	non			non
female	64	60-69	≥60		≥60	Basthma			Patients	Bulgarian	1.62	68	5	ex-smokers	ex-smokers	ex/current sm	non/ex-smokers		15	≥4 median	<65			AH			49	<60	<50	≥40	>35												non	non			non
male	68	60-69	≥60		≥60	Basthma			Patients	Bulgarian	1.76	80		non smokers	non smokers	non smokers	non/ex-smokers		19.5	≥4 median	≥65						48.5	<60	<50	≥40	>35		78.8										non	non			non
male	76	≥70	≥60		≥60	Basthma			Patients	Bulgarian	1.62	73		non smokers	non smokers	non smokers	non/ex-smokers		30	≥4 median	≥65						46	<60	<50	≥40	>35											no	non	non			non
male	59	<60	<60		<60	Basthma			Patients	Bulgarian	1.7	68		non smokers	non smokers	non smokers	non/ex-smokers		3	< 4 median	<65						56	<60	≥50	≥40	>35	67											non	non			non
male	57	<60	<60		<60	Basthma			Patients	Bulgarian	1.55	67		non smokers	non smokers	non smokers	non/ex-smokers		5.5	≥4 median	<65						51.5	<60	≥50	≥40	>35	74											non	non			non
male	59	<60	<60		<60	Basthma			Patients	Bulgarian	1.67	100		non smokers	non smokers	non smokers	non/ex-smokers		6	≥4 median	<65						53	<60	≥50	≥40	>35		81										non	non			non
male	68	60-69	≥60		≥60	Basthma			Patients	Bulgarian	1.58	90		non smokers	non smokers	non smokers	non/ex-smokers		11.5	≥4 median	≥65						56.5	<60	≥50	≥40	>35		53.1										non	non			non
male	67	60-69	≥60		≥60	Basthma			Patients	other (Turkish)	1.69	58		non smokers	non smokers	non smokers	non/ex-smokers		14.7	≥4 median	≥65						52.3	<60	≥50	≥40	>35		60.8										non	non			non
male	68	60-69	≥60		≥60	Basthma			Patients	Bulgarian	1.67	58		non smokers	non smokers	non smokers	non/ex-smokers		11	≥4 median	≥65						57	<60	≥50	≥40	>35		68.2										non	non			non
male	68	60-69	≥60		≥60	Basthma			Patients	Bulgarian	1.62	82		non smokers	non smokers	non smokers	non/ex-smokers		13	≥4 median	≥65						55	<60	≥50	≥40	>35												non	non			non
male	73	≥70	≥60		≥60	Basthma			Patients	Bulgarian	1.68	75		non smokers	non smokers	non smokers	non/ex-smokers		20	≥4 median	≥65			AH/HIBS			53	<60	≥50	≥40	>35											yes	non	non			non
male	77	≥70	≥60		≥60	Basthma			Patients	Bulgarian	1.6	80		non smokers	non smokers	non smokers	non/ex-smokers		24	≥4 median	≥65						53	<60	≥50	≥40	>35												non	non			non
male	74	≥70	≥60		≥60	Basthma			Patients	Bulgarian	1.5	70		non smokers	non smokers	non smokers	non/ex-smokers		2	< 4 median	≥65						72	≥60	≥50	≥40	>35												non	non			non
male	66	60-69	≥60		≥60	Basthma			Patients	Bulgarian	1.6	70		non smokers	non smokers	non smokers	non/ex-smokers		6	≥4 median	≥65			AH			60	≥60	≥50	≥40	>35												non	non			non
male	77	≥70	≥60		≥60	Basthma			Patients	Bulgarian	1.55	60		non smokers	non smokers	non smokers	non/ex-smokers	no	10	≥4 median	≥65			D,2, AH			67	≥60	≥50	≥40	>35		68										non	non			non
male	76	≥70	≥60		≥60	Basthma			Patients	Bulgarian	1.7	78		non smokers	non smokers	non smokers	non/ex-smokers		10	≥4 median	≥65						66	≥60	≥50	≥40	>35												non	non			non
male	72	≥70	≥60		≥60	Basthma			Patients	Bulgarian	1.6	69		non smokers	non smokers	non smokers	non/ex-smokers		8.9	≥4 median	≥65						63.1	≥60	≥50	≥40	>35	52											non	non			non
male	72	≥70	≥60		≥60	Basthma			Patients	Bulgarian	1.42	60		non smokers	non smokers	non smokers	non/ex-smokers		7.5	≥4 median	≥65						64.5	≥60	≥50	≥40	>35												non	non			non
female	68	60-69	≥60		≥60	Basthma			Patients	Bulgarian	1.7	82	15	ex-smokers	ex-smokers	ex/current sm	non/ex-smokers		7	≥4 median	≥65						61	≥60	≥50	≥40	>35												non	non			non
female	74	≥70	≥60		≥60	Basthma			Patients	Bulgarian	1.78	82	40	current smokers	current smokers	ex/current sm	current smokers		12	≥4 median	≥65						62	≥60	≥50	≥40	>35												non	non			non
male	31	<60	<60		<60	Basthma			Patients	Bulgarian	1.64	80		non smokers	non smokers	non smokers	non/ex-smokers	no	0	< 4 median	<65						31	<60	<50	<40	≤35												non	non			non
male	33	<60	<60		<60	Basthma			Patients	other (Turkish)	1.62	80		non smokers	non smokers	non smokers	non/ex-smokers		3.4	< 4 median	<65						29.6	<60	<50	<40	≤35		54.9										non	non			non
male	37	<60	<60		<60	Basthma			Patients	Bulgarian	1.5	69		non smokers	non smokers	non smokers	non/ex-smokers		2	< 4 median	<65						35	<60	<50	<40	≤35												non	non			non
male	7	<60	<60	<12	<60	AsthmaChildren			Patients	Bulgarian	1.22	20		non smokers	non smokers	non smokers	non/ex-smokers	no	0	< 4 median	<65						6	<60	<50	<40	≤35	59	109										non	non			non
female	30	<60	<60		<60	Basthma			Patients	other (Turkish)	1.7	72	15	current smokers	current smokers	ex/current sm	current smokers	no	1	< 4 median	<65						29	<60	<50	<40	≤35												non	non			non
male	33	<60	<60		<60	Basthma			Patients	Bulgarian	1.7	72		non smokers	non smokers	non smokers	non/ex-smokers		20	≥4 median	<65						13	<60	<50	<40	≤35												non	non			non
male	30	<60	<60		<60	Basthma			Patients	Bulgarian	1.7	72		non smokers	non smokers	non smokers	non/ex-smokers	no	4	≥4 median	<65						26	<60	<50	<40	≤35												non	non			non
male	20	<60	<60		<60	Basthma			Patients	Bulgarian	1.73	60		non smokers	non smokers	non smokers	non/ex-smokers		8	≥4 median	<65						12	<60	<50	<40	≤35												non	non			non
male	59	<60	<60		<60	Basthma			Patients	Bulgarian	1.78	79		non smokers	non smokers	non smokers	non/ex-smokers		39	≥4 median	<65						20	<60	<50	<40	≤35												non	non			non
male	35	<60	<60		<60	Basthma			Patients	Bulgarian				non smokers	non smokers	non smokers	non/ex-smokers		10	≥4 median	<65						25	<60	<50	<40	≤35												non	non			non
male	28	<60	<60		<60	Basthma			Patients	Bulgarian				non smokers	non smokers	non smokers	non/ex-smokers		8	≥4 median	<65						20	<60	<50	<40	≤35												non	non			non
male	19	<60	<60		<60	Basthma			Patients	Bulgarian	1.65	50		non smokers	non smokers	non smokers	non/ex-smokers		14	≥4 median	<65						5	<60	<50	<40	≤35												non	non			non
male	43	<60	<60		<60	Basthma			Patients	Bulgarian	1.68	68		non smokers	non smokers	non smokers	non/ex-smokers		9.5	≥4 median	<65						33.5	<60	<50	<40	≤35	73											non	non			non
male	42	<60	<60		<60	Basthma			Patients	Bulgarian	1.68	55		non smokers	non smokers	non smokers	non/ex-smokers		39	≥4 median	<65						3	<60	<50	<40	≤35												non	non			non
male	21	<60	<60		<60	Basthma			Patients	Bulgarian	1.6	56		non smokers	non smokers	non smokers	non/ex-smokers		19	≥4 median	<65						2	<60	<50	<40	≤35												non	non			non
male	50	<60	<60		<60	Basthma			Patients	Bulgarian	1.68	75		non smokers	non smokers	non smokers	non/ex-smokers		16	≥4 median	<65			AH			34	<60	<50	<40	≤35											yes	non	non			non
male	42	<60	<60		<60	Basthma			Patients	Bulgarian	1.62	76		non smokers	non smokers	non smokers	non/ex-smokers		8	≥4 median	<65			Hr. pielonefrit			34	<60	<50	<40	≤35											yes	non	non			non
male	40	<60	<60		<60	Basthma			Patients	Bulgarian	1.5	85		non smokers	non smokers	non smokers	non/ex-smokers		5	≥4 median	<65			D2,steatoza,			35	<60	<50	<40	≤35		88	3.06	306								non	non			non
male	27	<60	<60		<60	Basthma			Patients	Bulgarian	1.6	80		non smokers	non smokers	non smokers	non/ex-smokers		20	≥4 median	<65						7	<60	<50	<40	≤35	75	69.2										non	non			non
male	8	<60	<60	<12	<60	AsthmaChildren			Patients	Bulgarian	1.21	25		non smokers	non smokers	non smokers	non/ex-smokers	yes	6	≥4 median	<65						2	<60	<50	<40	≤35	76	109										non	non			non
male	72	≥70	≥60		≥60	Basthma			Patients	Bulgarian	1.68	90		non smokers	non smokers	non smokers	non/ex-smokers		42	≥4 median	≥65			IBS, D,			30	<60	<50	<40	≤35	65	61	0.44	44								non	non			non
male	77	≥70	≥60		≥60	Basthma			Patients	Bulgarian				non smokers	non smokers	non smokers	non/ex-smokers		46	≥4 median	≥65			AH			31	<60	<50	<40	≤35											yes	non	non			non
male	85	≥70	≥60		≥60	Basthma			Patients	Bulgarian	1.6	88		non smokers	non smokers	non smokers	non/ex-smokers		65	≥4 median	≥65			AH			20	<60	<50	<40	≤35											yes	non	non			non
male	56	<60	<60		<60	Basthma			Patients	Bulgarian	1.6	95		non smokers	non smokers	non smokers	non/ex-smokers				<65							<60			>35												non	non			non
male	65	60-69	≥60		≥60	Basthma			Patients	Bulgarian	1.58	73		non smokers	non smokers	non smokers	non/ex-smokers				≥65							≥60			>35												non	non			non
male	60	60-69	≥60		≥60	Basthma			Patients	Bulgarian	1.7	81		non smokers	non smokers	non smokers	non/ex-smokers				<65							<60															non	non			non
male	53	<60	<60		<60	controls			Controls	Bulgarian											<65							<60															non	non			non
male	45	<60	<60		<60	controls			Controls	Bulgarian											<65							<60															non	non			non
male	45	<60	<60		<60	controls			Controls	Bulgarian											<65							<60															non	non			non
male	54	<60	<60		<60	controls			Controls	Bulgarian											<65							<60															non	non			non
male	52	<60	<60		<60	controls			Controls	Bulgarian											<65							<60															non	non			non
male	54	<60	<60		<60	controls			Controls	Bulgarian											<65							<60															non	non			non
male	48	<60	<60		<60	controls			Controls	Bulgarian											<65							<60															non	non			non
male	44	<60	<60		<60	controls			Controls	Bulgarian											<65							<60															non	non			non
male	48	<60	<60		<60	controls			Controls	Bulgarian											<65							<60															non	non			non
male	56	<60	<60		<60	controls			Controls	Bulgarian											<65							<60															non	non			non
male	57	<60	<60		<60	controls			Controls	Bulgarian											<65							<60															non	non			non
male	50	<60	<60		<60	controls			Controls	Bulgarian											<65							<60															non	non			non
male	53	<60	<60		<60	controls			Controls	Bulgarian											<65							<60															non	non			non
male	57	<60	<60		<60	controls			Controls	Bulgarian											<65							<60															non	non			non
male	47	<60	<60		<60	controls			Controls	Bulgarian											<65							<60															non	non			non
male	53	<60	<60		<60	controls			Controls	Bulgarian											<65							<60															non	non			non
male	50	<60	<60		<60	controls			Controls	Bulgarian											<65							<60															non	non			non
male	59	<60	<60		<60	controls			Controls	Bulgarian											<65							<60															non	non			non
male	53	<60	<60		<60	controls			Controls	Bulgarian											<65							<60															non	non			non
male	53	<60	<60		<60	controls			Controls	Bulgarian											<65							<60															non	non			non
male	57	<60	<60		<60	controls			Controls	Bulgarian											<65							<60															non	non			non
male	55	<60	<60		<60	controls			Controls	Bulgarian											<65							<60															non	non			non
male	49	<60	<60		<60	controls			Controls	Bulgarian											<65							<60															non	non			non
male	44	<60	<60		<60	controls			Controls	Bulgarian											<65							<60															non	non			non
male	55	<60	<60		<60	controls			Controls	Bulgarian											<65							<60															non	non			non
male	57	<60	<60		<60	controls			Controls	Bulgarian											<65							<60															non	non			non
male	48	<60	<60		<60	controls			Controls	Bulgarian											<65							<60															non	non			non
male	49	<60	<60		<60	controls			Controls	Bulgarian											<65							<60															non	non			non
male	57	<60	<60		<60	controls			Controls	Bulgarian											<65							<60															non	non			non
male	46	<60	<60		<60	controls			Controls												<65							<60															non	non			non
male	50	<60	<60		<60	controls			Controls	Bulgarian											<65			NAP				<60															non	non			non
male	51	<60	<60		<60	controls			Controls	Bulgarian											<65							<60															non	non			non
male	48	<60	<60		<60	controls			Controls	Bulgarian											<65							<60															non	non			non
male	47	<60	<60		<60	controls			Controls	Bulgarian											<65							<60															non	non			non
male	44	<60	<60		<60	controls			Controls	Bulgarian											<65							<60															non	non			non
male	42	<60	<60		<60	controls			Controls	Bulgarian											<65							<60															non	non			non
male	47	<60	<60		<60	controls			Controls	Bulgarian											<65							<60															non	non			non
male	55	<60	<60		<60	controls			Controls	Bulgarian											<65							<60															non	non			non
male	58	<60	<60		<60	controls			Controls	Bulgarian											<65							<60															non	non			non
male	42	<60	<60		<60	controls			Controls	Bulgarian											<65							<60															non	non			non
male	56	<60	<60		<60	controls			Controls	Bulgarian											<65							<60															non	non			non
male	56	<60	<60		<60	controls			Controls	Bulgarian											<65							<60														no	non	non			non
male	54	<60	<60		<60	controls			Controls	Bulgarian											<65							<60															non	non			non
male	43	<60	<60		<60	controls			Controls	Bulgarian											<65							<60															non	non			non
male	44	<60	<60		<60	controls			Controls	Bulgarian											<65							<60															non	non			non
male	49	<60	<60		<60	controls			Controls	Bulgarian											<65							<60															non	non			non
male	43	<60	<60		<60	controls			Controls	Bulgarian											<65							<60															non	non			non
male	49	<60	<60		<60	controls			Controls	Bulgarian											<65							<60															non	non			non
male	45	<60	<60		<60	controls			Controls	Bulgarian											<65							<60															non	non			non
male	50	<60	<60		<60	controls			Controls	Bulgarian											<65							<60														no	non	non			non
male	47	<60	<60		<60	controls			Controls	Bulgarian											<65							<60															non	non			non
male	46	<60	<60		<60	controls			Controls	Bulgarian											<65							<60														no	non	non			non
male	56	<60	<60		<60	controls			Controls	Bulgarian											<65							<60															non	non			non
male	43	<60	<60		<60	controls			Controls	Bulgarian											<65							<60															non	non			non
male	55	<60	<60		<60	controls			Controls	Bulgarian											<65							<60															non	non			non
male	47	<60	<60		<60	controls			Controls	Bulgarian											<65							<60															non	non			non
male	37	<60	<60		<60	controls			Controls	Bulgarian											<65							<60															non	non			non
male	53	<60	<60		<60	controls			Controls	Bulgarian											<65							<60															non	non			non
male	25	<60	<60		<60	controls			Controls												<65							<60															non	non			non
male						controls			Controls										5	≥4 median								<60															non	non			non
male	58	<60	<60		<60	controls			Controls	Bulgarian											<65							≥60															non	non			non
male	60	60-69	≥60		≥60	controls			Controls	Bulgarian											<65							≥60															non	non			non
male	61	60-69	≥60		≥60	controls			Controls	Bulgarian											<65							≥60															non	non			non
male	61	60-69	≥60		≥60	controls			Controls	Bulgarian											<65							≥60															non	non			non
male	60	60-69	≥60		≥60	controls			Controls	Bulgarian											<65							≥60															non	non			non
male	60	60-69	≥60		≥60	controls			Controls	Bulgarian											<65							≥60															non	non			non
male	60	60-69	≥60		≥60	controls			Controls	Bulgarian											<65							≥60															non	non			non
male	62	60-69	≥60		≥60	controls			Controls	Bulgarian											<65							≥60															non	non			non
male	60	60-69	≥60		≥60	controls			Controls	Bulgarian											<65							≥60															non	non			non
male	62	60-69	≥60		≥60	controls			Controls	Bulgarian											<65							≥60															non	non			non
male	64	60-69	≥60		≥60	controls			Controls	Bulgarian											<65							≥60															non	non			non
male	62	60-69	≥60		≥60	controls			Controls	Bulgarian											<65							≥60															non	non			non
male	62	60-69	≥60		≥60	controls			Controls	Bulgarian											<65							≥60															non	non			non
male	60	60-69	≥60		≥60	controls			Controls	Bulgarian											<65							≥60															non	non			non
male	60	60-69	≥60		≥60	controls			Controls	Bulgarian											<65							≥60															non	non			non
male	63	60-69	≥60		≥60	controls			Controls	Bulgarian											<65							≥60															non	non			non
male	61	60-69	≥60		≥60	controls			Controls	Bulgarian											<65							≥60															non	non			non
male	64	60-69	≥60		≥60	controls			Controls	Bulgarian											<65							≥60															non	non			non
male	62	60-69	≥60		≥60	controls			Controls	Bulgarian											<65							≥60															non	non			non
male	78	≥70	≥60		≥60	controls	controls non-smokers	controls non-smokers	Controls	Bulgarian	1.57	70		non smokers	non smokers	non smokers	non/ex-smokers				≥65			AH				≥60														yes	non	non			non
male	66	60-69	≥60		≥60	controls			Controls	Bulgarian											≥65							≥60															non	non			non
male	66	60-69	≥60		≥60	controls			Controls	Bulgarian											≥65							≥60															non	non			non
male	69	60-69	≥60		≥60	controls			Controls	Bulgarian											≥65							≥60															non	non			non
male	69	60-69	≥60		≥60	controls			Controls	Bulgarian											≥65							≥60															non	non			non
male	69	60-69	≥60		≥60	controls			Controls	Bulgarian											≥65							≥60															non	non			non
male	68	60-69	≥60		≥60	controls			Controls	Bulgarian											≥65							≥60															non	non			non
male	68	60-69	≥60		≥60	controls			Controls	Bulgarian											≥65							≥60															non	non			non
male	73	≥70	≥60		≥60	controls			Controls	Bulgarian											≥65							≥60															non	non			non
male	77	≥70	≥60		≥60	controls			Controls	Bulgarian											≥65							≥60														no	non	non			non
male	71	≥70	≥60		≥60	controls			Controls	Bulgarian											≥65							≥60															non	non			non
male	76	≥70	≥60		≥60	controls			Controls	Bulgarian											≥65							≥60															non	non			non
male	72	≥70	≥60		≥60	controls			Controls	Bulgarian											≥65							≥60															non	non			non
male	75	≥70	≥60		≥60	controls			Controls	Bulgarian											≥65							≥60															non	non			non
male	75	≥70	≥60		≥60	controls			Controls	Bulgarian											≥65							≥60															non	non			non
male	85	≥70	≥60		≥60	controls			Controls	Bulgarian											≥65							≥60															non	non			non
male	74	≥70	≥60		≥60	controls			Controls	Bulgarian											≥65							≥60															non	non			non
male	77	≥70	≥60		≥60	controls			Controls	Bulgarian											≥65							≥60															non	non			non
male	82	≥70	≥60		≥60	controls			Controls	Bulgarian											≥65							≥60															non	non			non
male	73	≥70	≥60		≥60	controls			Controls	Bulgarian											≥65							≥60															non	non			non
male	74	≥70	≥60		≥60	controls			Controls	Bulgarian											≥65							≥60															non	non			non
male	73	≥70	≥60		≥60	controls			Controls	Bulgarian											≥65							≥60															non	non			non
male	74	≥70	≥60		≥60	controls			Controls	Bulgarian											≥65							≥60															non	non			non
male	80	≥70	≥60		≥60	controls			Controls	Bulgarian											≥65							≥60															non	non			non
male						COPD			Patients													a-yes	yes																a-yes				non	non			non
male						COPD			Patients													a-yes	yes																a-yes				non	non			non
male						COPD			Patients													a-yes	yes																a-yes				non	non			non
male						COPD			Patients													a-yes	yes																				non	non			non
male	63	60-69	≥60	≥12	≥60				Patients	Bulgarian	1.6	88		non smokers	non smokers	non smokers	non/ex-smokers				<65			Ca lung/pneumonia	1	chemotherapy																yes	non	non			non
female	60	60-69	≥60		≥60	Basthma			Patients	Bulgarian	1.76	84	20	current smokers	current smokers	ex/current sm	current smokers	no			<65																						non	non			non
male	68	60-69	≥60		≥60	Basthma			Patients	Bulgarian	1.56	62		non smokers	non smokers	non smokers	non/ex-smokers				≥65																						non	non			non
male						controls			Controls																																		non	non			non
male						controls			Controls																																		non	non			non
male						controls			Controls																																		non	non			non
male						controls			Controls																																		non	non			non
male						controls			Controls																																		non	non			non
male						controls			Controls																																		non	non			non
male						controls			Controls																																		non	non			non
male						controls			Controls																																		non	non			non
male						controls			Controls																																		non	non			non
male						controls			Controls																																		non	non			non
male						controls			Controls																																		non	non			non
male						controls			Controls																																		non	non			non
male						controls			Controls																																		non	non			non
male						controls			Controls																																		non	non			non
male						controls			Controls																																		non	non			non
male						controls			Controls																																		non	non			non
male						controls			Controls																																		non	non			non
male						controls			Controls																																		non	non			non
male						controls			Controls																																		non	non			non
male						controls			Controls																																		non	non			non
male						controls			Controls																																		non	non			non
male						controls			Controls																																		non	non			non
male						controls																																					non	non			non
male						controls			Controls	Bulgarian																																	non	non			non
male						controls			Controls	Bulgarian																																	non	non			non
male																																											non	non			non
female	62	60-69	≥60		≥60	COPD	COPD	COPD current smokers	Patients	Bulgarian	1.8	68	43	current smokers	current smokers	ex/current sm	current smokers	no	5	≥4 median	<65	a-yes	yes				57	<60	≥50	≥40	>35	49	50.4	3.07	307	III	III/IV	II/III	a-yes	no	NO	no	studied	studied	GC	CG/GG	studied	CT	CT/TT
[truncated: 10 more columns]
